# Supplementary material for: Hierarchically stabilized Pt single-atom catalysts induced by an atomic substitution strategy for an efficient hydrogen evolution reaction
Source: Royal Society of Chemistry journal article supplement (doi:10.1039/d3ee04457b), 2024-01-01
Supplement: d3ee04457b1.pdf [file d3ee04457b1.pdf]

## Supporting Information

### **Hierarchically Stabilized Pt Single-Atom Catalysts Induced by Atomic Substitution Strategy for Efficient Hydrogen Evolution Reaction**

*Changle Yue,<sup>a</sup> Chao Feng,<sup>a</sup> Guangxun Sun,<sup>a</sup> Na Liu,<sup>a</sup> Haoyuan Hao,<sup>a</sup> Wenjing Bao,<sup>a</sup> Xiaowei Zhang,<sup>a</sup> Fengyue Sun,<sup>a</sup> Cong Zhang,<sup>a</sup> Jiahui Bi,<sup>a</sup> Yan Zhou,<sup>a</sup> Hsiao-Chien Chen,<sup>b</sup> Yuan Pan,<sup>\*a</sup> Daofeng Sun,<sup>a</sup> and Yukun Lu,<sup>\*a</sup>*

\*Corresponding author: Yuan Pan, panyuan@upc.edu.cn; Yukun Lu, lyk@upc.edu.cn

Supplementary Text

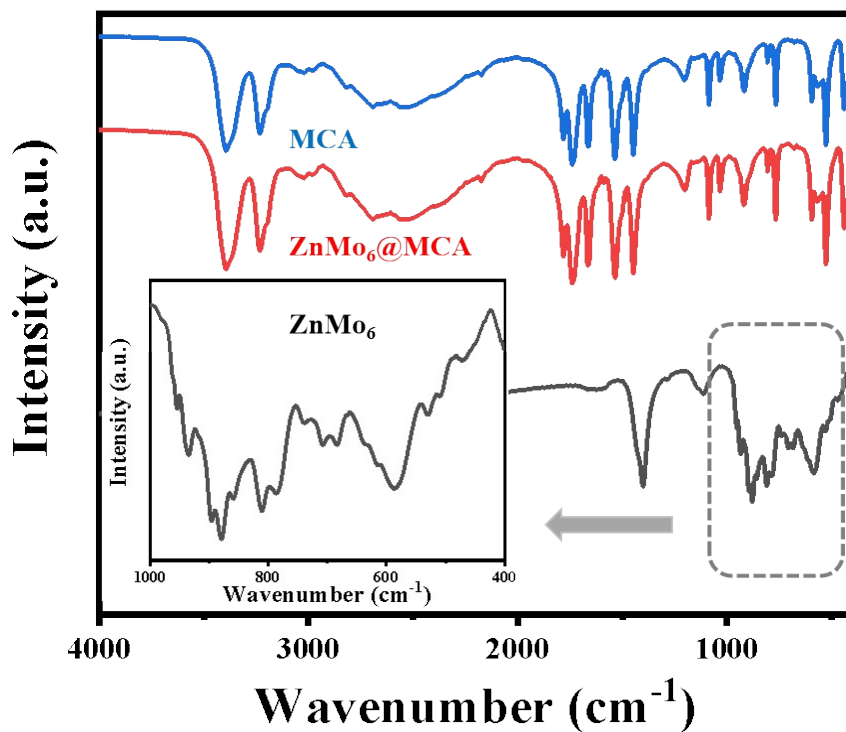

**Fig. S1.** FT-IR spectra of ZnMo<sub>6</sub> (dark gray), MCA (blue) and ZnMo<sub>6</sub>@MCA (red).

As shown in Fig. S1, the MCA was successfully obtained and maintained in ZnMo<sub>6</sub>@MCA. The IR characteristic peaks of ZnMo<sub>6</sub> were not exhibited in ZnMo<sub>6</sub>@MCA, which may be due to the low content of ZnMo<sub>6</sub> resulting in the masking of the characteristic peaks below 1000 cm<sup>-1</sup>.

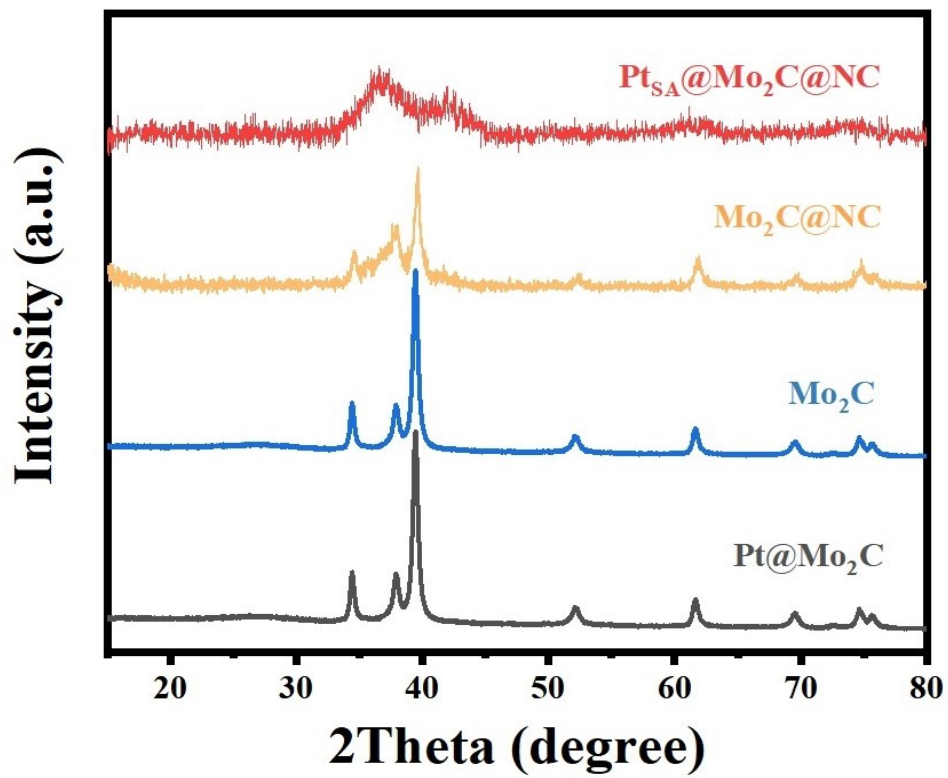

Fig. S2. XRD patterns for Pt<sub>SA</sub>@Mo<sub>2</sub>C@NC, Mo<sub>2</sub>C@NC, Mo<sub>2</sub>C and Pt@Mo<sub>2</sub>C.

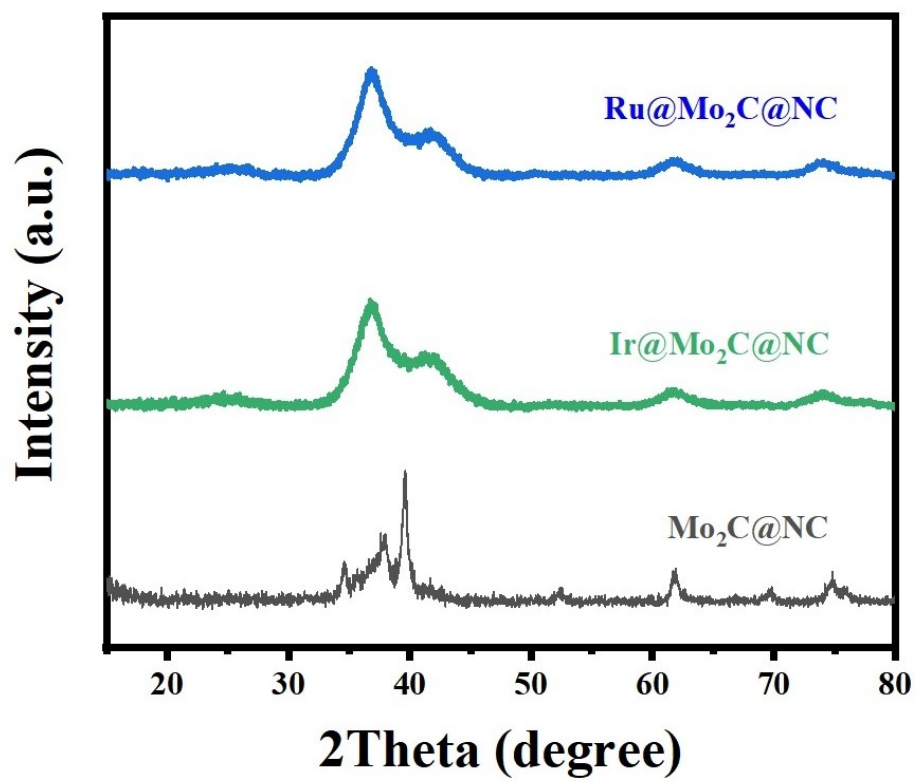

**Fig. S3.** XRD patterns for Ru@Mo<sub>2</sub>C@NC, Ir@Mo<sub>2</sub>C@NC and Mo<sub>2</sub>C@NC.

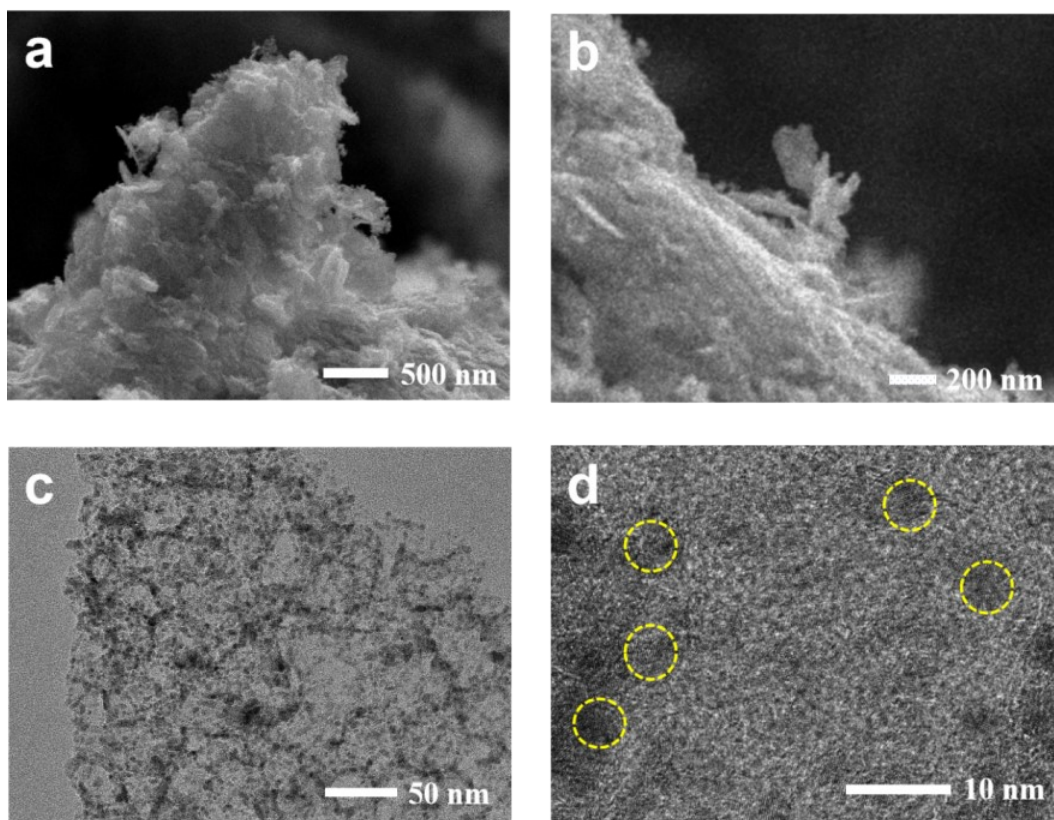

**Fig. S4.** Morphology and structure of Pt<sub>SA</sub>@Mo<sub>2</sub>C@NC. (a, b) SEM images of Pt<sub>SA</sub>@Mo<sub>2</sub>C@NC and (c, d) HRTEM images of Pt<sub>SA</sub>@Mo<sub>2</sub>C@NC.

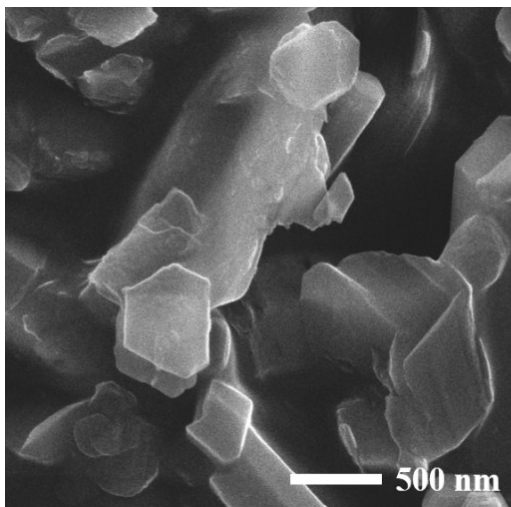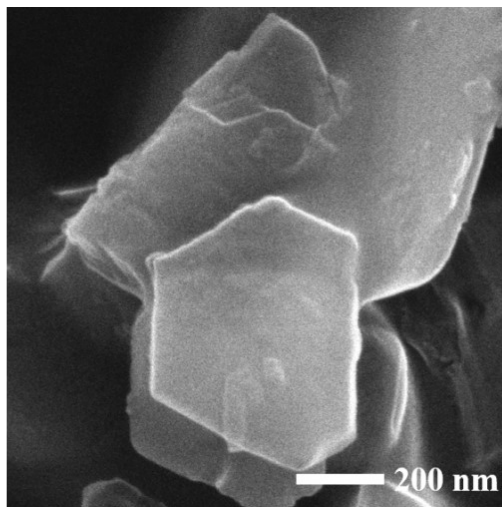

**Fig. S5.** SEM image of ZnMo<sub>6</sub>@MCA.

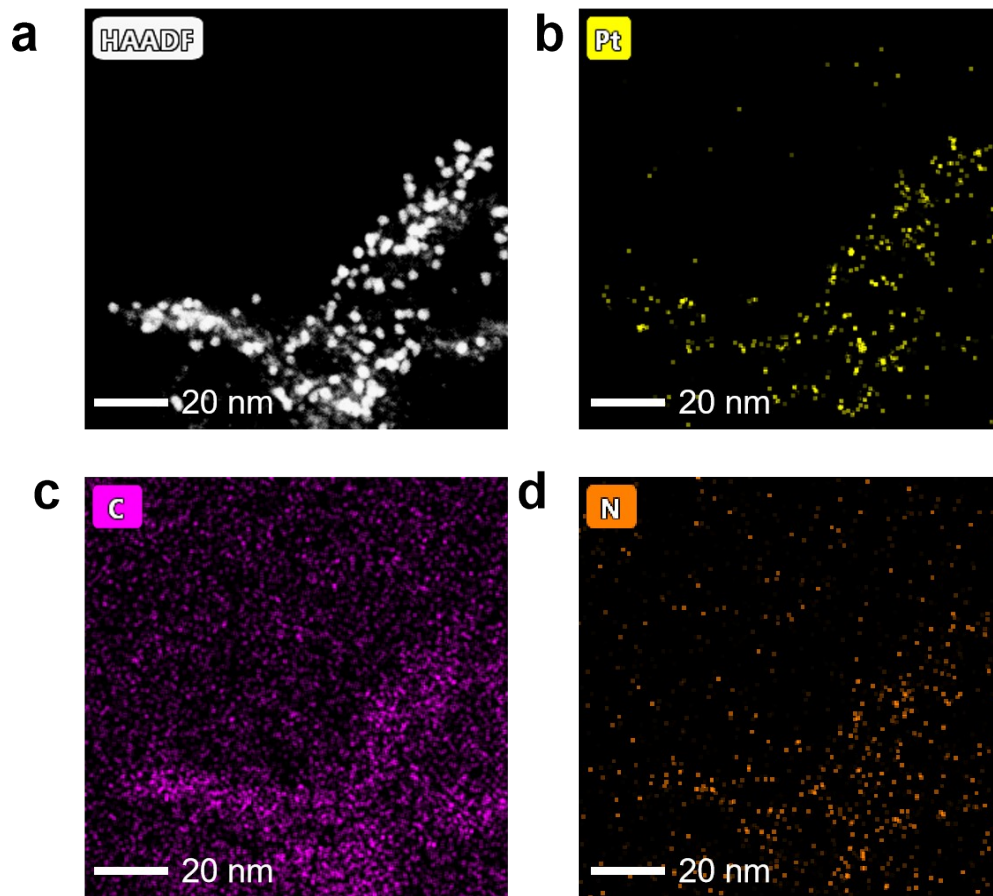

**Fig. S6.** HAADF-STEM images of Pt, C and N elements in Pt@NC.

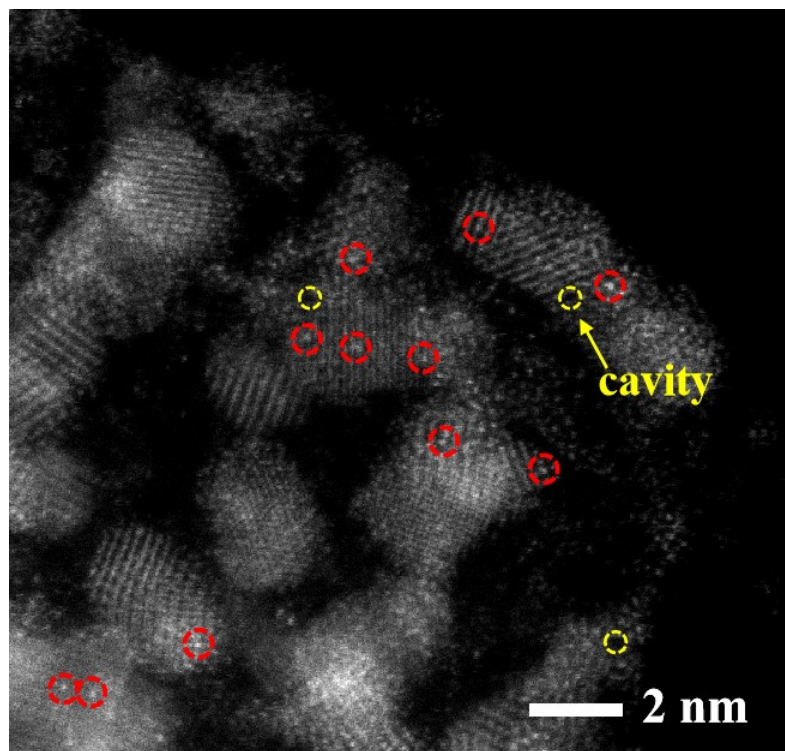

**Fig. S7.** AC-HAADF-STEM image of Pt<sub>SA</sub>@Mo<sub>2</sub>C@NC.



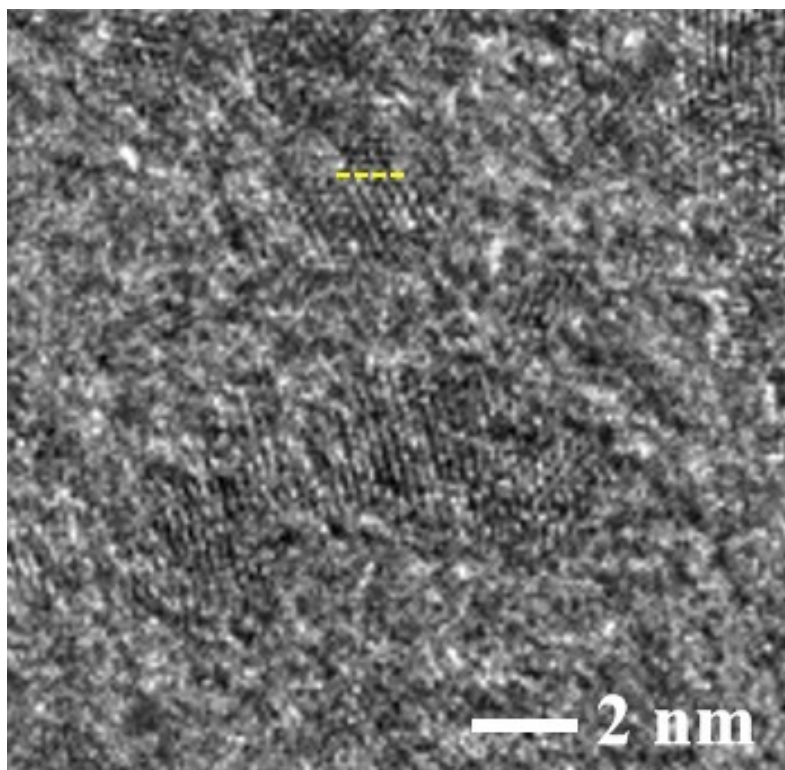

**Fig. S8.** Schematic HRTEM of  $\text{Mo}_2\text{C@NC}$ : the yellow line corresponds to the intensity map of  $\text{Mo}_2\text{C}$  in Fig. 3f of the manuscript.

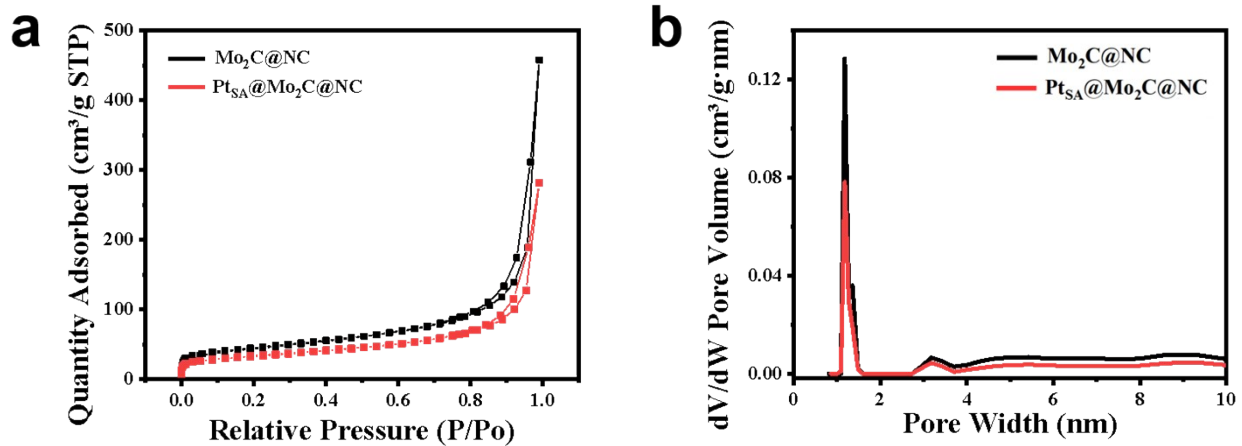

**Fig. S9.** Apparent structure of Pt<sub>SA</sub>@Mo<sub>2</sub>C@NC. (a) Nitrogen adsorption-desorption isotherms and (b) DFT pore distribution of Pt<sub>SA</sub>@Mo<sub>2</sub>C@NC and Mo<sub>2</sub>C@NC

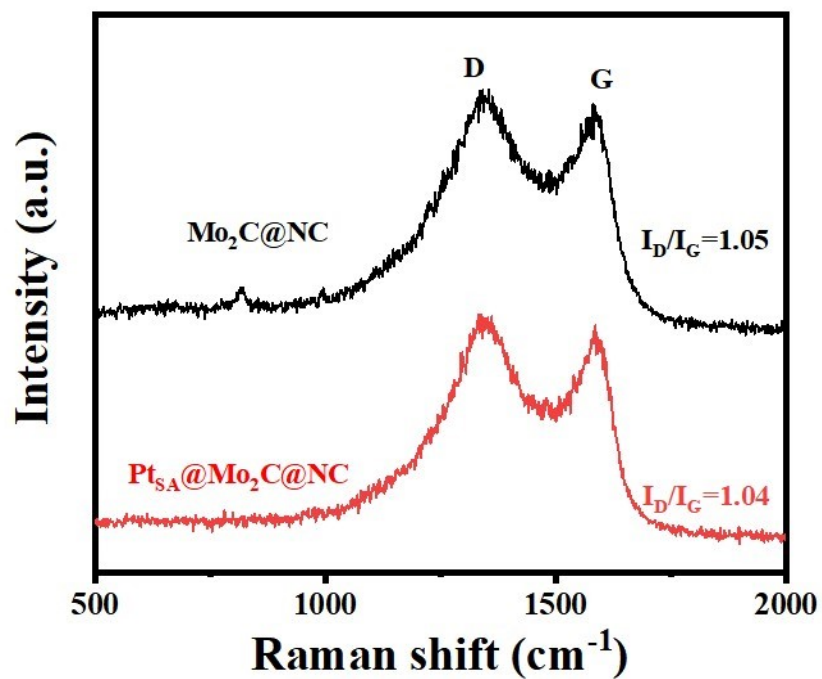

**Fig. S10.** Raman spectrum of Pt<sub>SA</sub>@Mo<sub>2</sub>C@NC and Mo<sub>2</sub>C@NC.

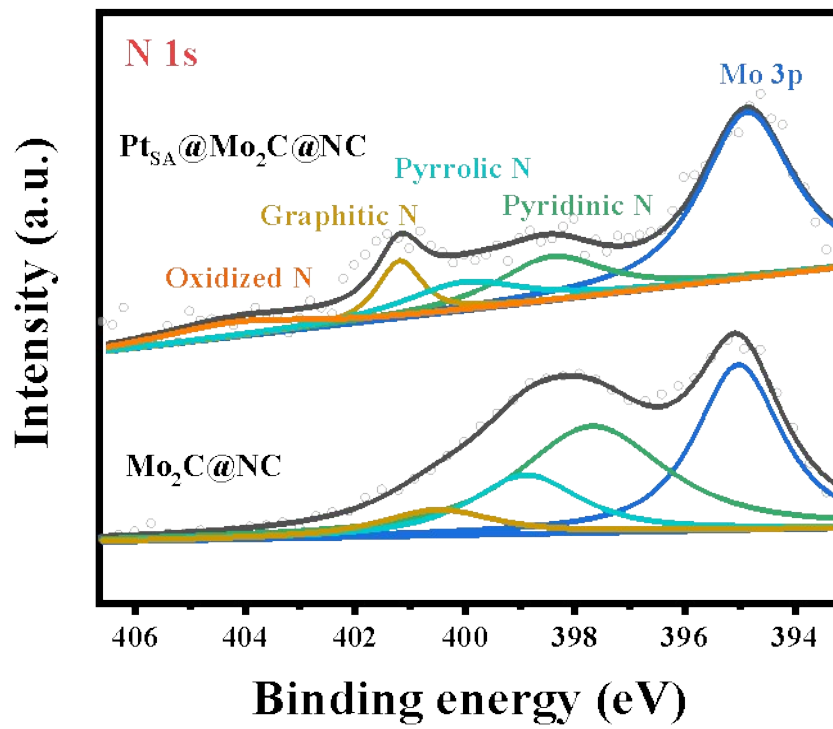

**Fig. S11.** High-resolution XPS spectra of N 1s in Pt<sub>SA</sub>@Mo<sub>2</sub>C@NC and Mo<sub>2</sub>C@NC.

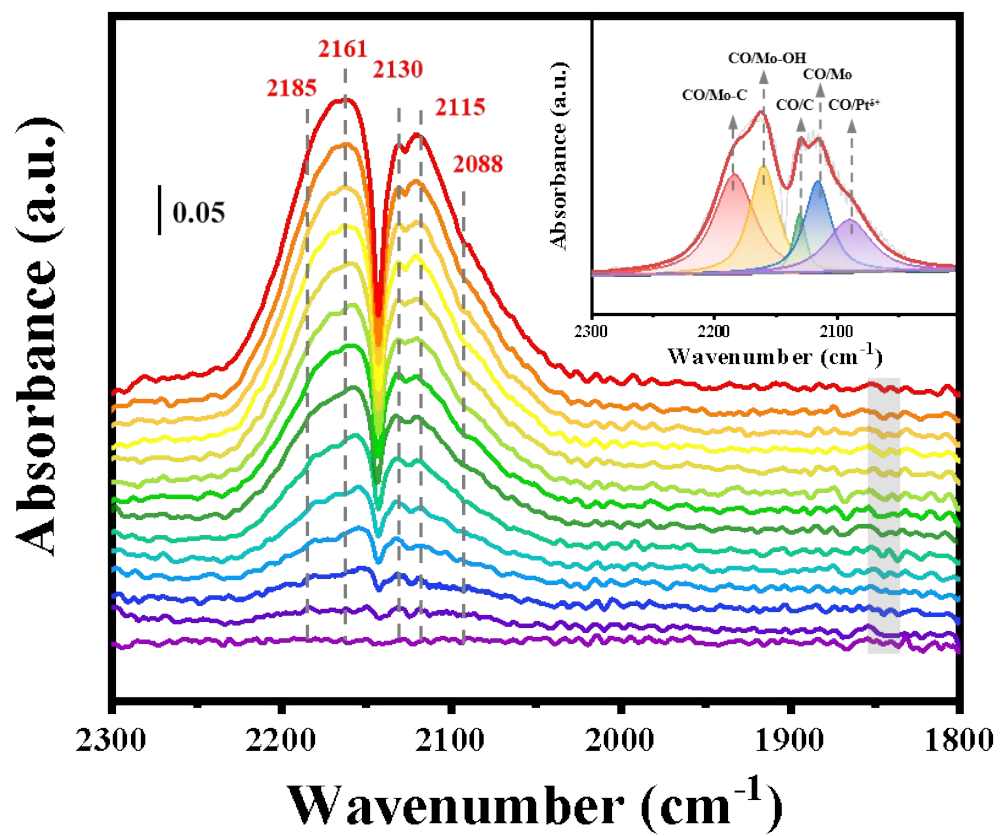

**Fig. S12.** IR/CO spectra and decomposition of the saturated CO adsorption spectra (inset) of Pt<sub>SA</sub>@Mo<sub>2</sub>C@NC

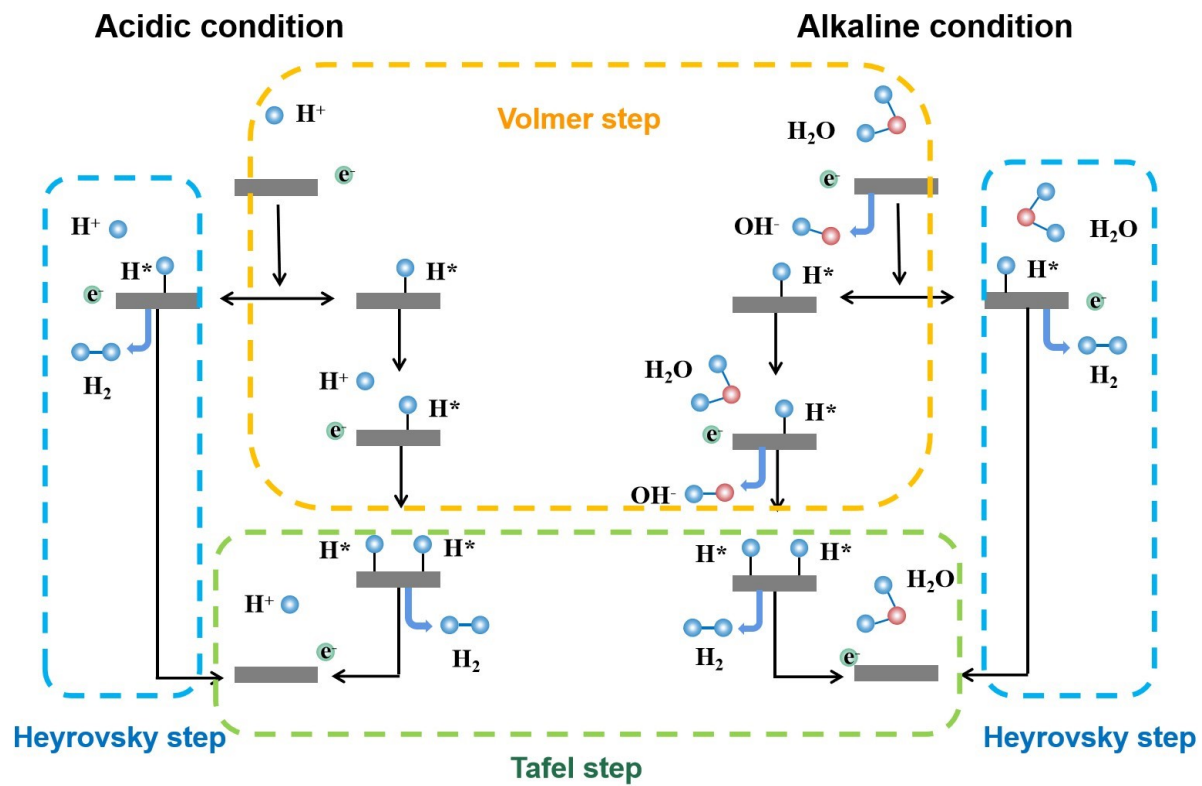

**Fig. S13.** Schematic representation of the HER mechanism under acidic and alkaline conditions.

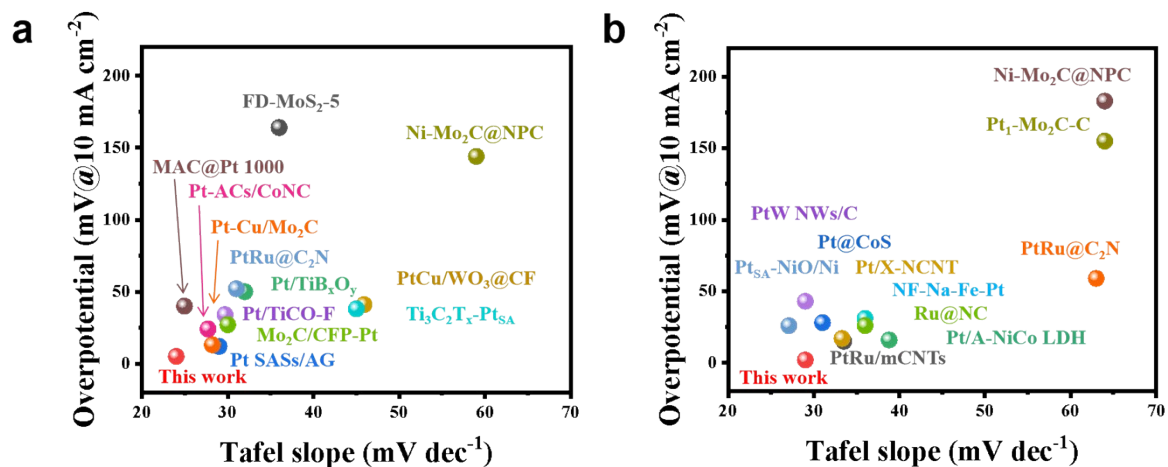

**Fig. S14.** HER performance comparison of reported catalysts. Comparison graph of catalyst performance in (a) 0.5 M H<sub>2</sub>SO<sub>4</sub> and (b) 1.0 M KOH: including overpotential and Tafel slope.

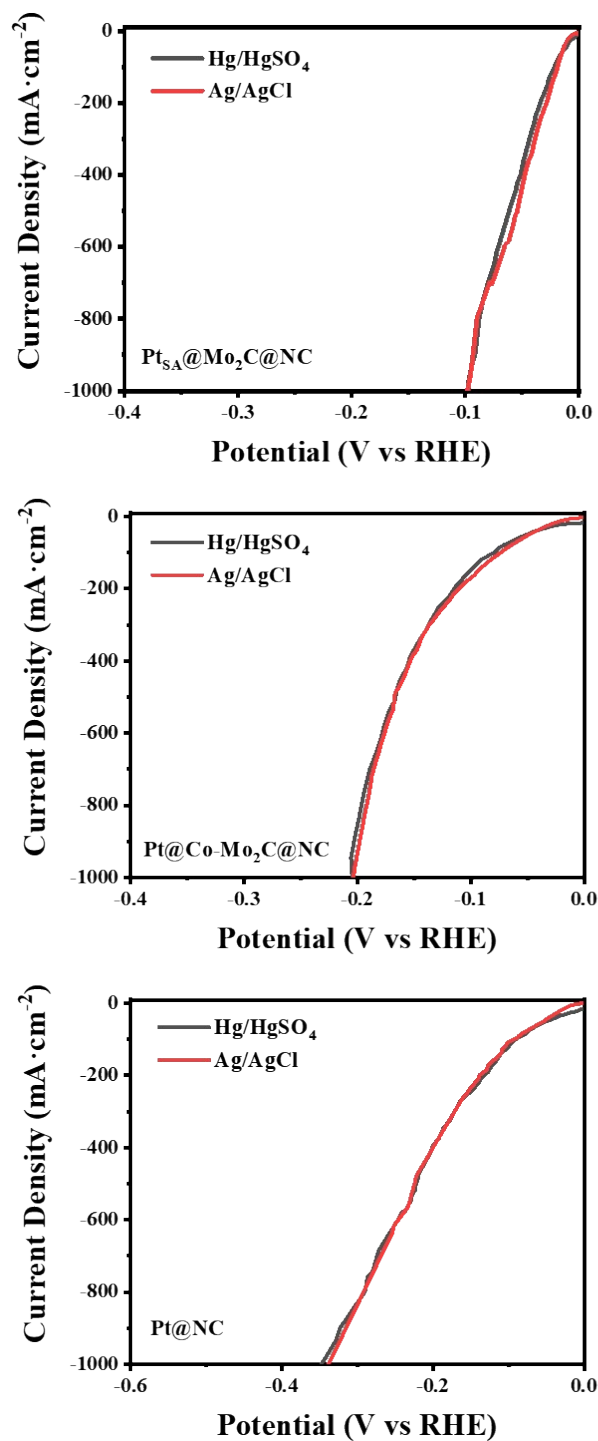

**Fig. S15.** Polarization curves of HER in  $0.5 \text{ M H}_2\text{SO}_4$  of Pt<sub>SA</sub>@Mo<sub>2</sub>C@NC, Pt@Co-Mo<sub>2</sub>C@NC, Pt@NC using the Hg/HgSO<sub>4</sub> reference electrode.



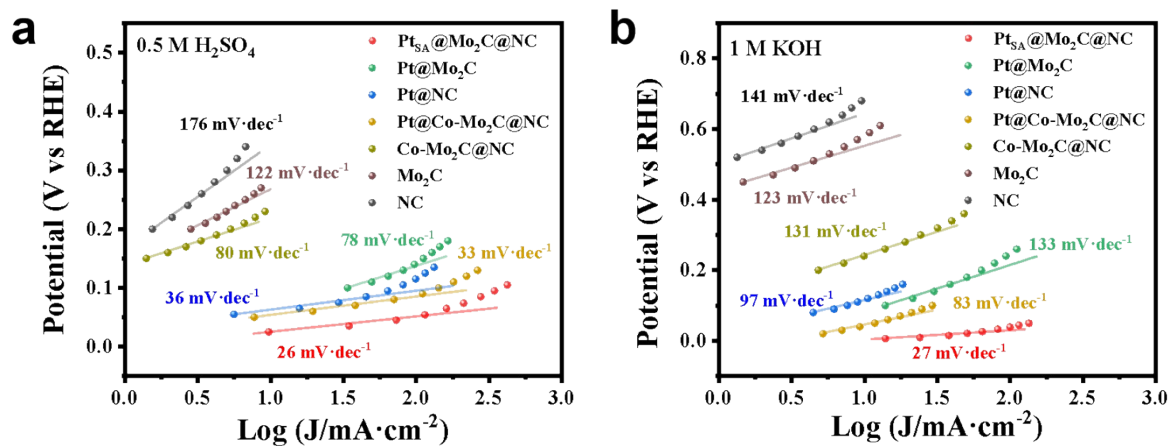

**Fig. S16.** Tafel curve of series catalysts. Tafel curves of various catalysts of Pt<sub>SA</sub>@Mo<sub>2</sub>C@NC, Pt@Mo<sub>2</sub>C, Pt@NC, Co-Mo<sub>2</sub>C@NC, Mo<sub>2</sub>C@NC and NC in (a) 0.5 M H<sub>2</sub>SO<sub>4</sub> and (b) 1.0 M KOH measured by the controlled potential electrolysis.

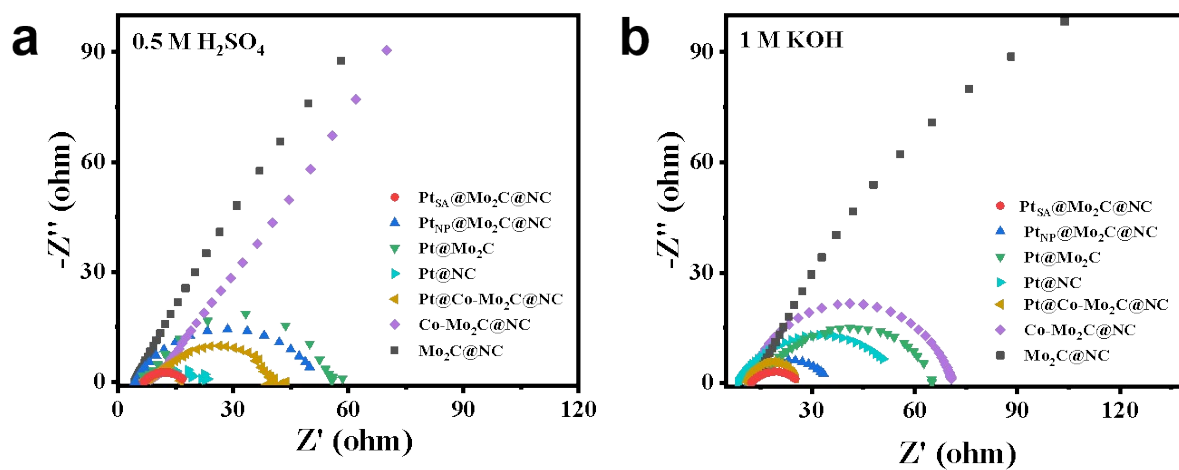

**Fig. S17.** Resistances of series catalysts. Electrochemical impedance spectroscopy (EIS) of of  $Pt_{SA}@Mo_2C@NC$ ,  $Pt@Mo_2C$ ,  $Pt@NC$ ,  $Co-Mo_2C@NC$ ,  $Mo_2C@NC$  and  $NC$  in (a) 0.5 M  $H_2SO_4$  and (b) 1.0 M KOH.

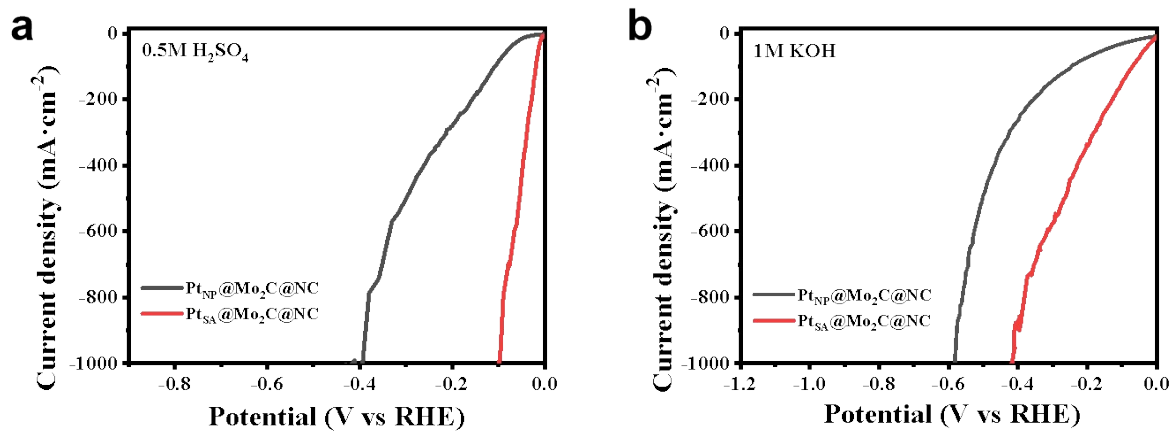

**Fig. S18.** HER performance of Pt<sub>NP</sub>@Mo<sub>2</sub>C@NC and Pt<sub>NP</sub>@Mo<sub>2</sub>C@NC. HER polarization curves of Pt<sub>SA</sub>@Mo<sub>2</sub>C@NC and Pt<sub>NP</sub>@Mo<sub>2</sub>C@NC in 0.5 M H<sub>2</sub>SO<sub>4</sub> (a) and 1.0 M KOH (b).

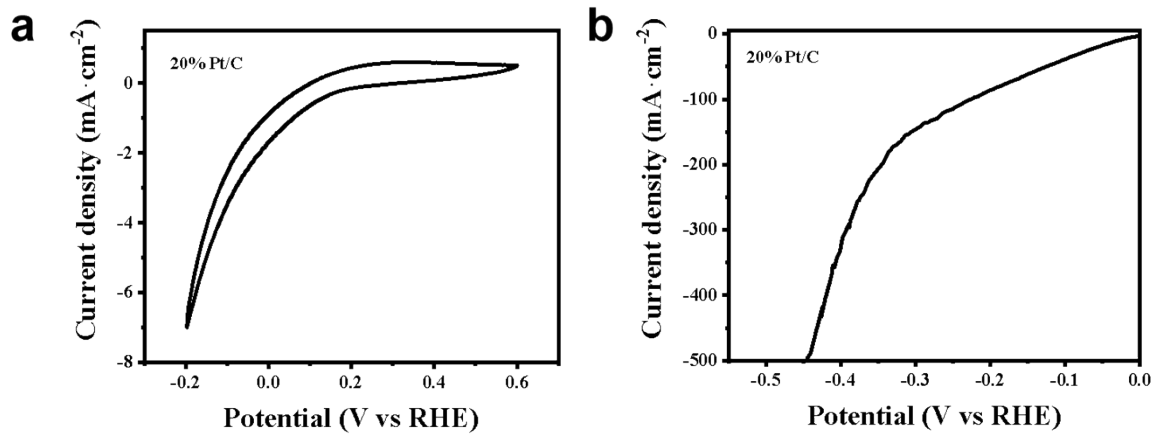

**Fig. S19.** Performance of commercial 20% Pt/C. (a) CV curve in 1.0 M PBS solution and (b) LSV curve in 0.5 M  $\text{H}_2\text{SO}_4$  of 20% Pt/C catalyst.

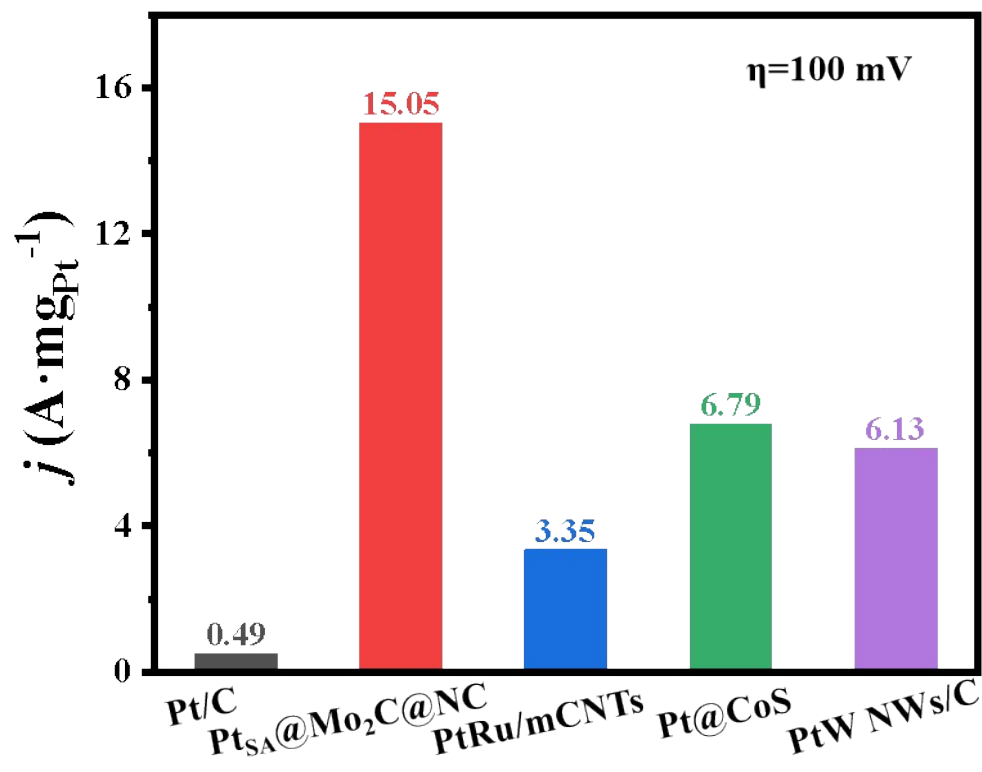

Fig. S20. Mass activity of Pt<sub>SA</sub>@Mo<sub>2</sub>C@NC catalyst and other reported catalysts in 1.0 M KOH.

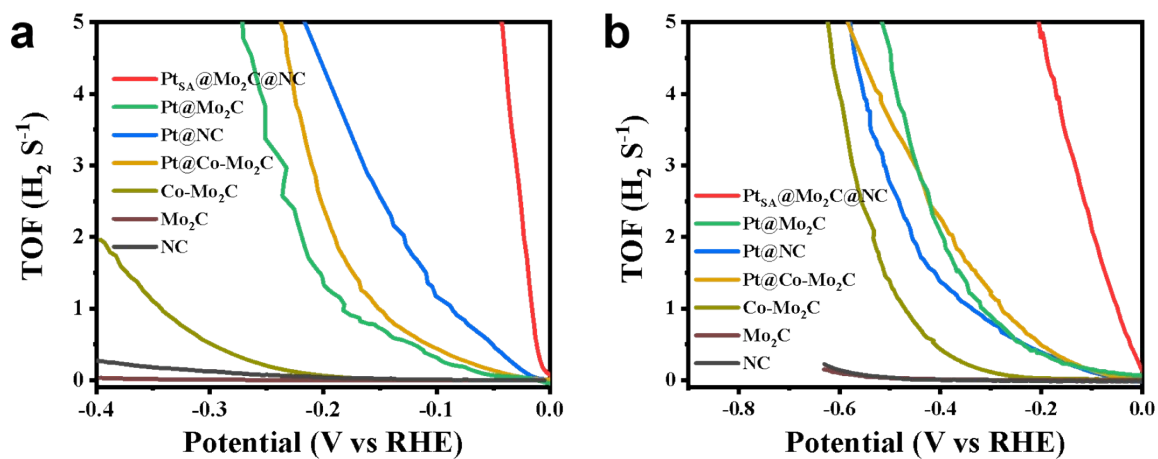

**Fig. S21.** Intrinsically active of series catalysts. Turnover frequency (TOF) of the catalysts tested in  $0.5 \text{ M H}_2\text{SO}_4$  (a) and  $1 \text{ M KOH}$  (b) solution.

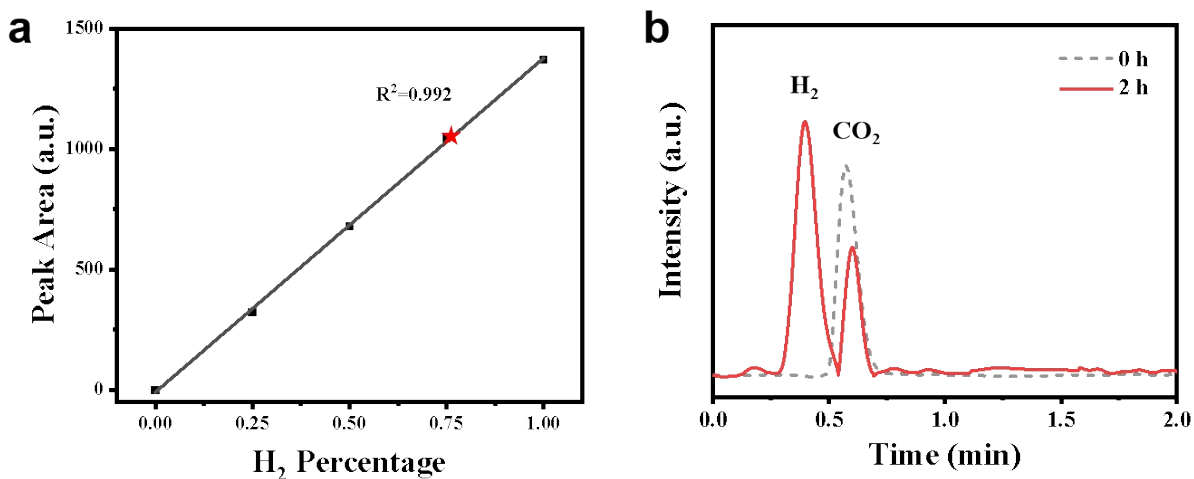

**Fig. S22.** (a) The calibration curve obtained by ultrapure hydrogen (99.999%) and (b) gas chromatogram before and after electrolysis.

The calibration curve was obtained using ultrapure hydrogen (99.999%) of different concentrations in Fig. S22a. CO<sub>2</sub> is used to displace the air inside the cathode electrolytic cell. The 1 mL gas above the electrolyte was then analysed by gas chromatography, as shown in Fig. S22b. After the electrolysis of the Pt<sub>SA</sub>@Mo<sub>2</sub>C@NC catalyst under a current of 100 mA·cm<sup>-2</sup> for 2 h, the 1 mL gas mixture above the electrolyte was taken from the cathodic electrolytic cell and analysed by gas chromatography. Then, applying the dilution factor, it was possible to know the amount of hydrogen present in the Head Space. The red mark in Fig. 22a indicates that the amount of hydrogen in the mixed gas after electrolysis is about 0.752 mL.

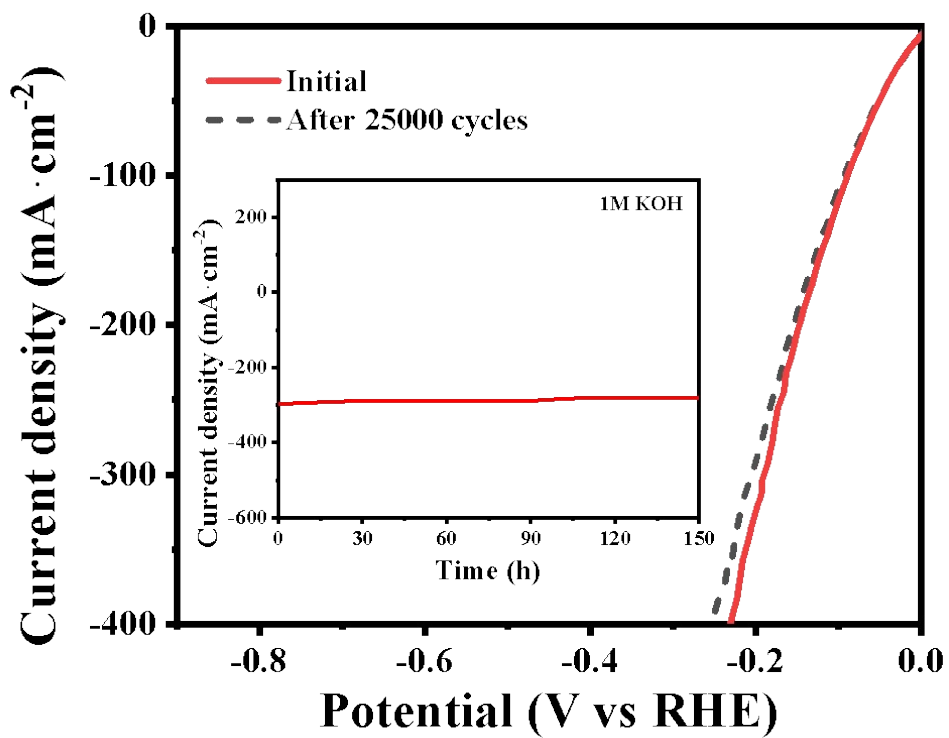

Fig. S23. Stability test of Pt<sub>SA</sub>@Mo<sub>2</sub>C@NC in 1.0 M KOH.



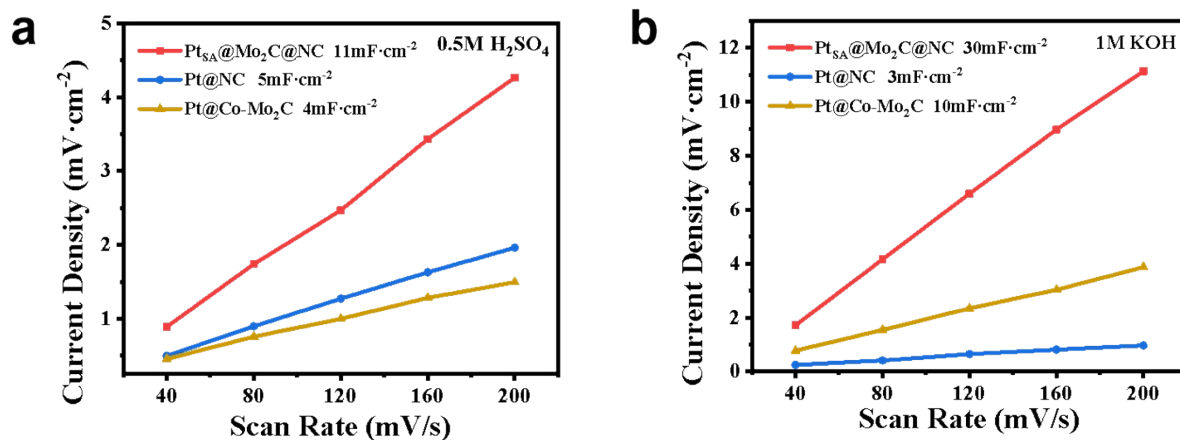

**Fig. S24.** Double-layer capacitance ( $C_{dl}$ ) of series catalysts.  $C_{dl}$  determined by plotting capacitive currents as function of scan rate in of alkaline (a) and acidic solutions (b).

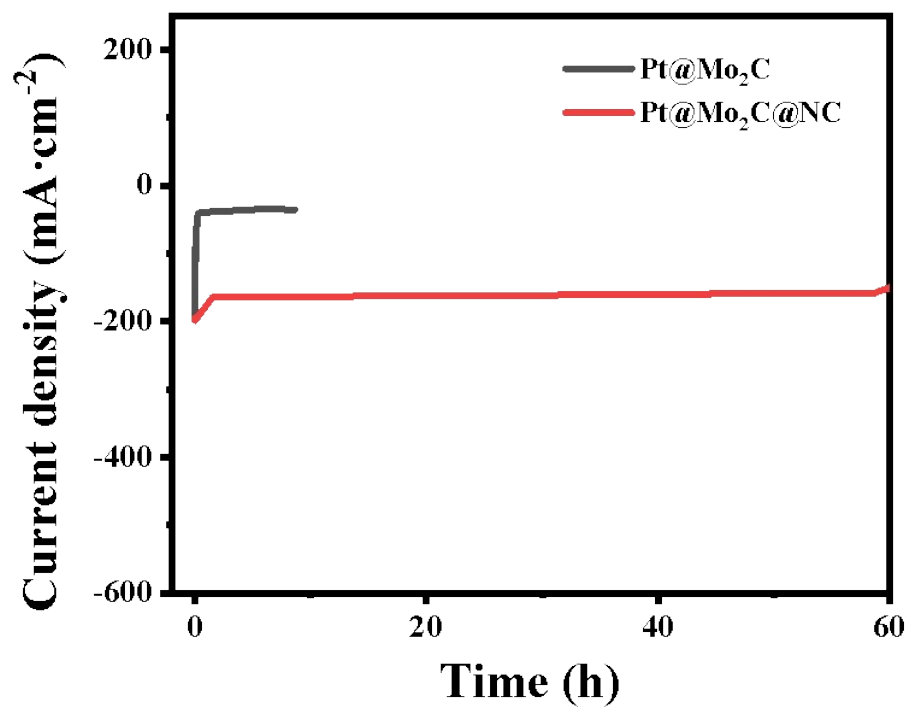

Fig. S25. Stability test of Pt<sub>SA</sub>@Mo<sub>2</sub>C@NC and Pt@Mo<sub>2</sub>C.

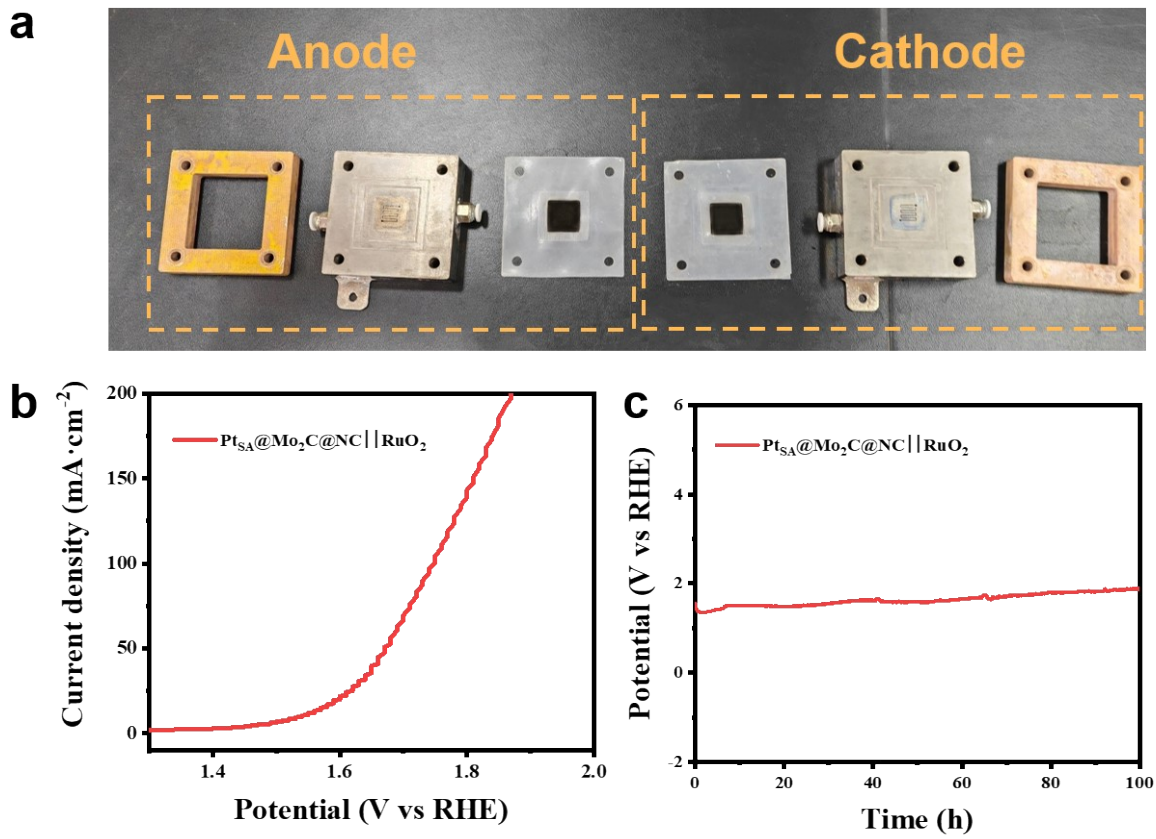

**Fig. S26.** (a) Photograph of the PEM device, (b) the polarization curves of Pt<sub>SA</sub>@Mo<sub>2</sub>C@NC recorded between 1.3 and 2.0 V<sub>cell</sub> at 50 °C in neutral solution. (c) The voltage–time stability of Pt<sub>SA</sub>@Mo<sub>2</sub>C@NC as cathode in PEM.

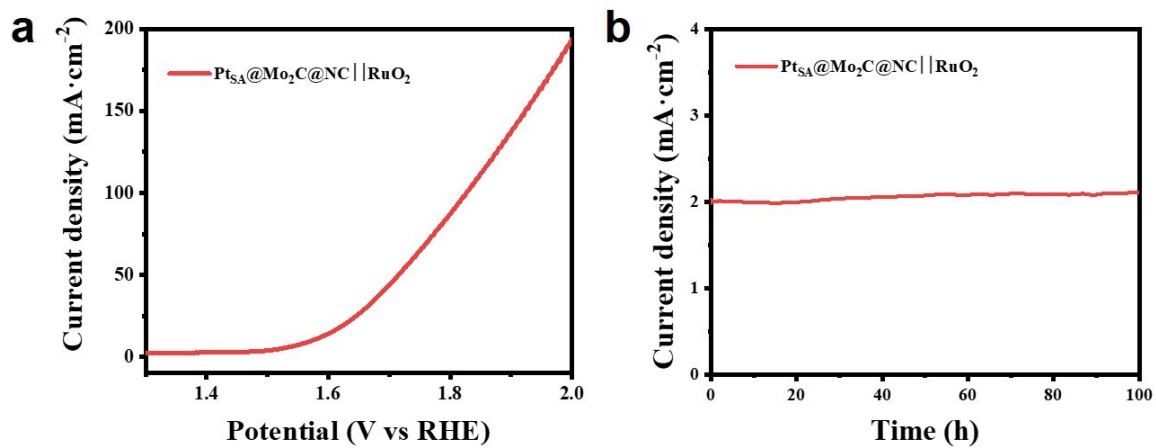

**Fig. S27.** (a) The polarization curves of Pt<sub>SA</sub>@Mo<sub>2</sub>C@NC recorded between 1.3 and 2.0 V<sub>cell</sub> at 50 °C in neutral solution. (b) The voltage–time stability of Pt<sub>SA</sub>@Mo<sub>2</sub>C@NC as cathode in AEM.

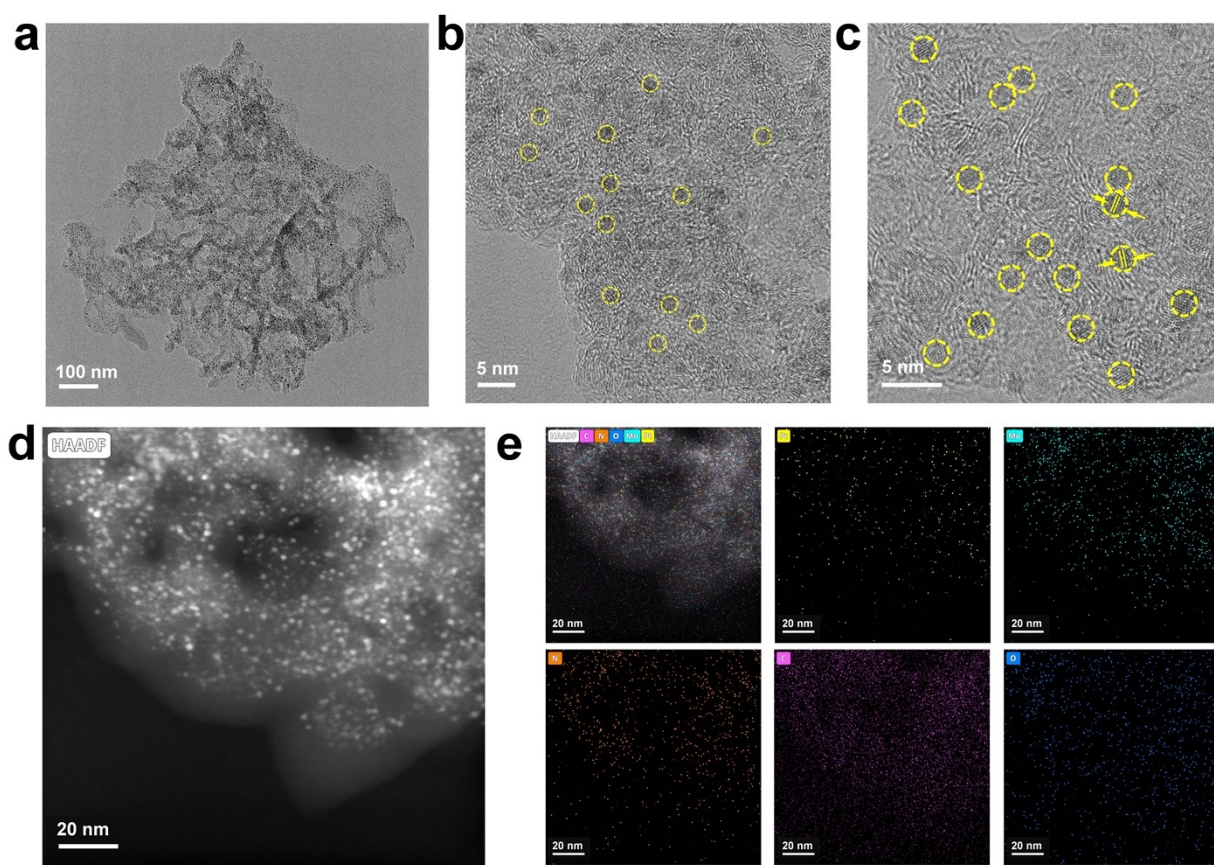

**Fig. S28.** (a-c) HRTEM and (d) HAADF-STEM images and (e) corresponding EDS mapping of  $\text{Pt}_{\text{SA}}@\text{Mo}_2\text{C}@\text{NC}$  after HER stability test.

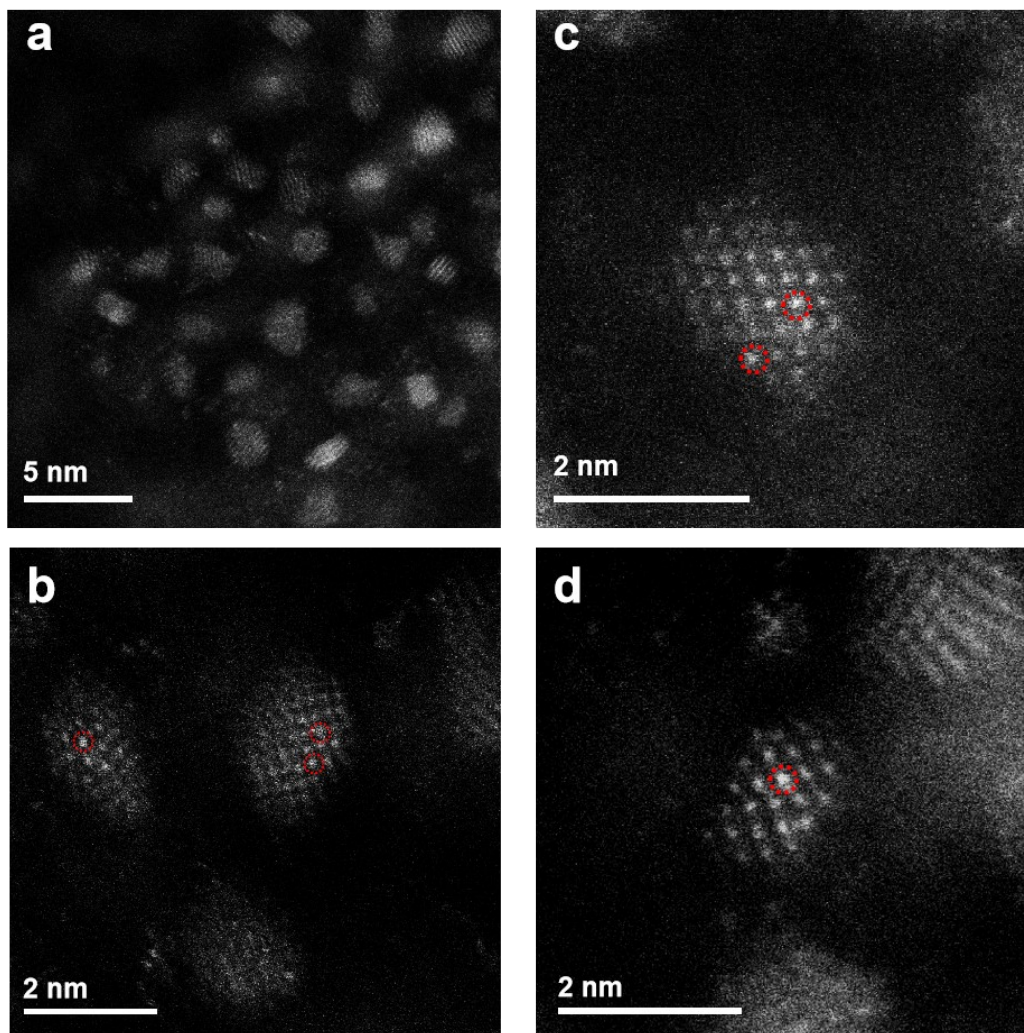

**Fig. S29.** AC-HAADF-STEM images of Pt<sub>5A</sub>@Mo<sub>2</sub>C@NC after HER process.

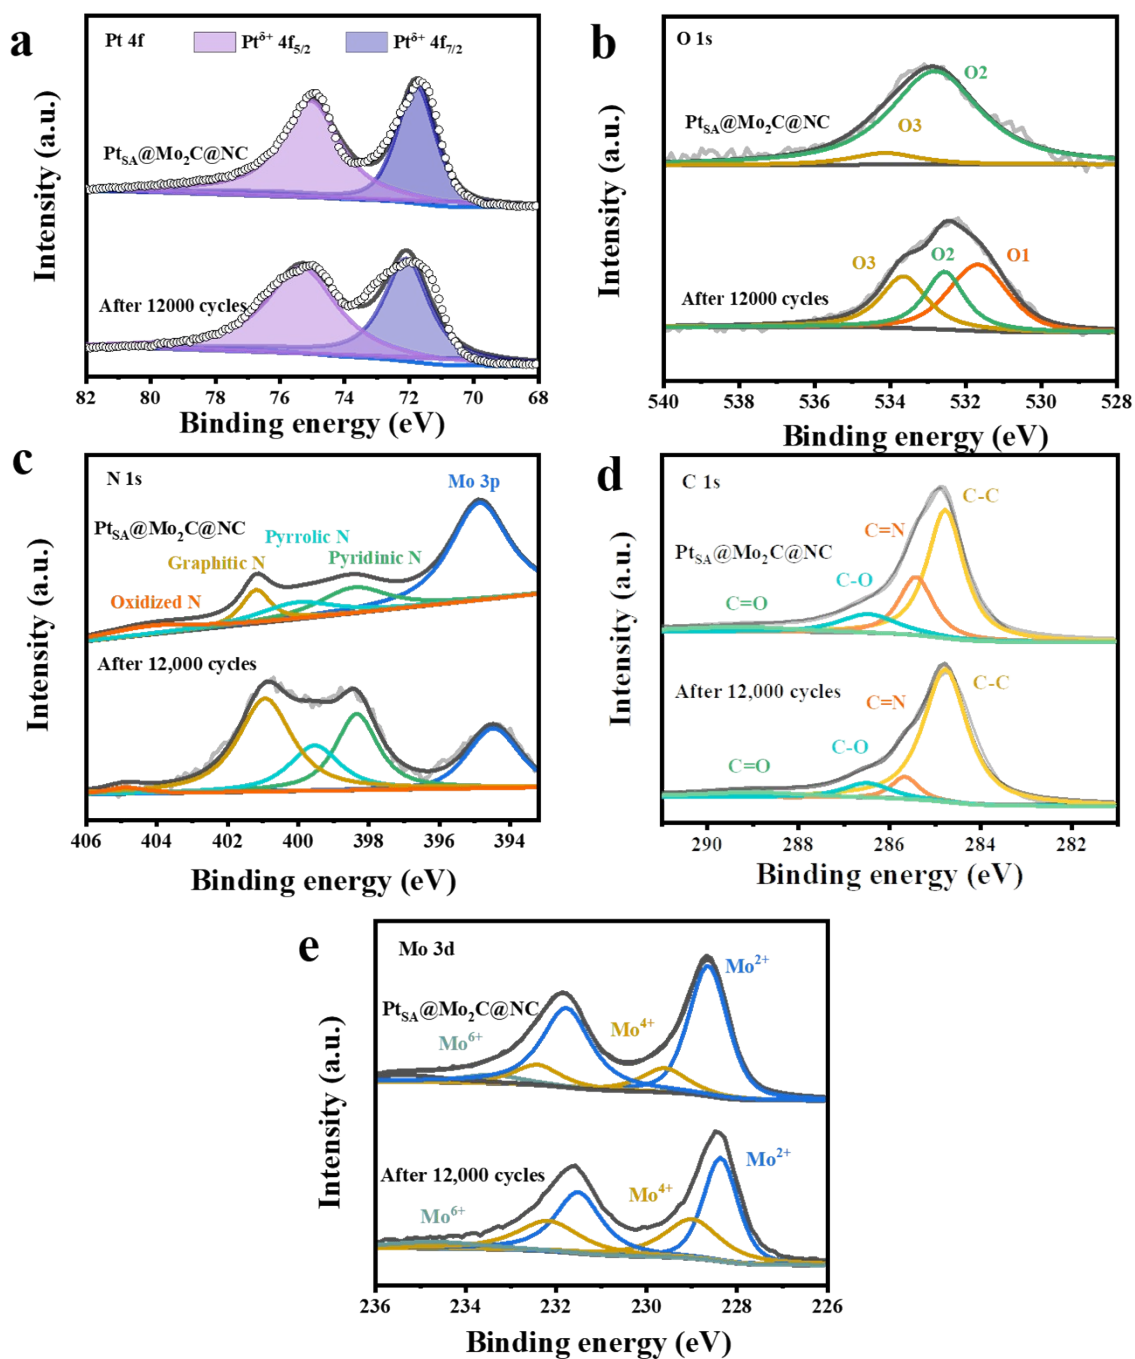

**Fig. S30.** Electronic structure before and after the HER process. High-resolution XPS spectra of Pt 4f (a), O 1s (b), N 1s (c), C 1s (d) and Mo 3d (e) in pristine Pt<sub>SA</sub>@Mo<sub>2</sub>C@NC and Pt<sub>SA</sub>@Mo<sub>2</sub>C@NC after 12,000 cycles.

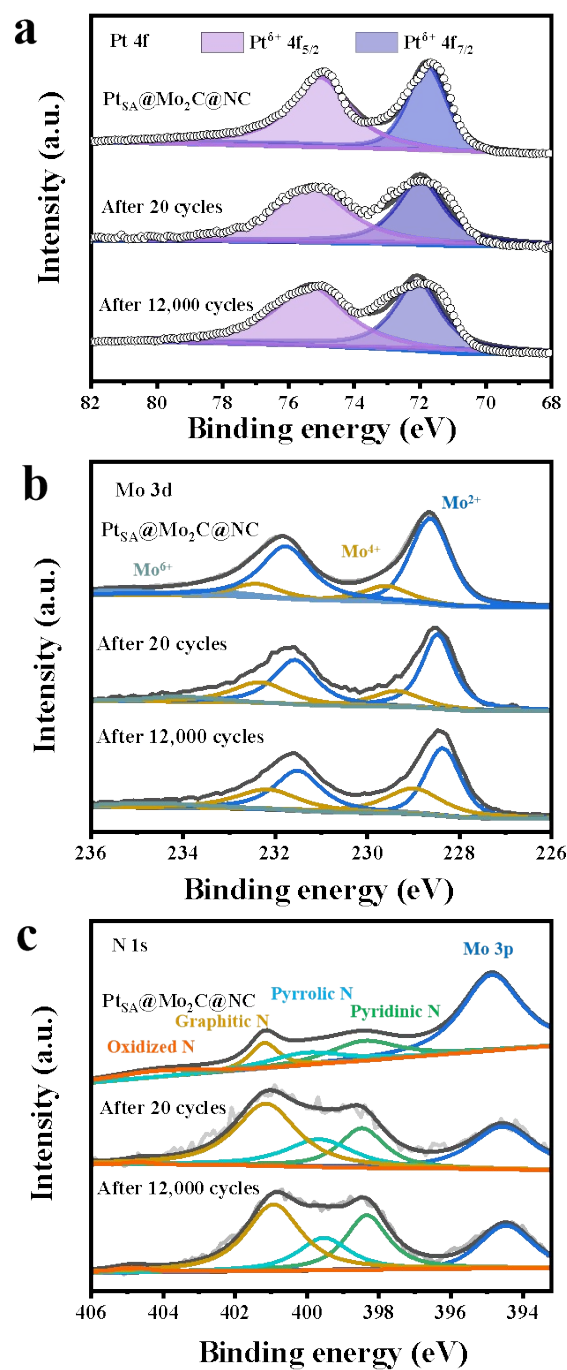

**Fig. S31.** Electronic structure before and after the HER process. High-resolution XPS spectra of Pt 4f (a), Mo 3d (b) and N 1s (c) in pristine Pt<sub>SA</sub>@Mo<sub>2</sub>C@NC and Pt<sub>SA</sub>@Mo<sub>2</sub>C@NC after 20 and 12,000 cycles.



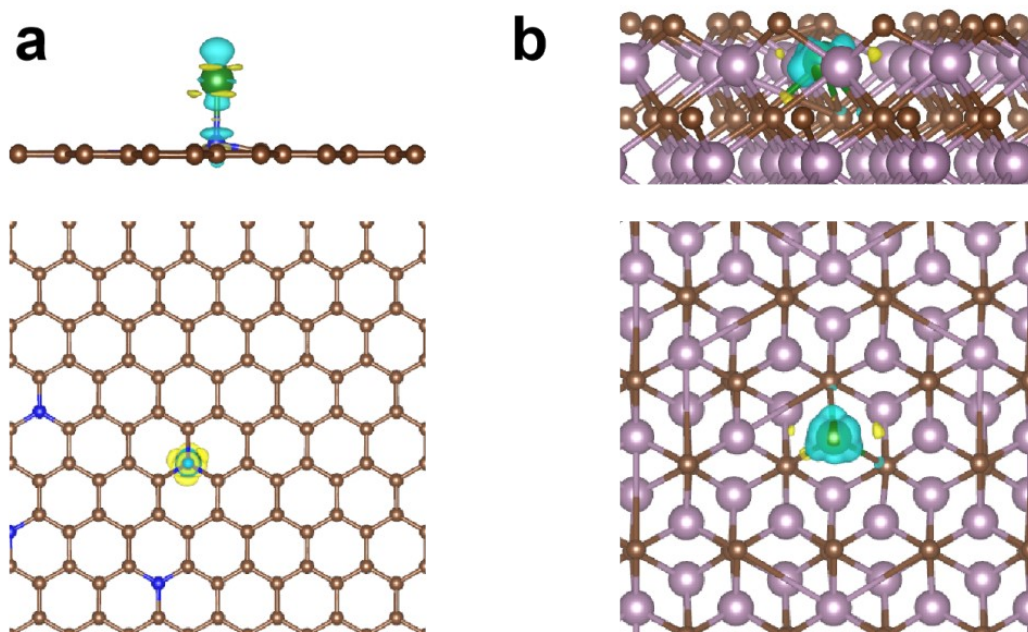

**Fig. S32.** Charge density difference of Pt@NC (a) and Pt@Mo<sub>2</sub>C (b). Pt atoms: green; Mo atoms: purple; N atoms: blue, C atoms: brown.

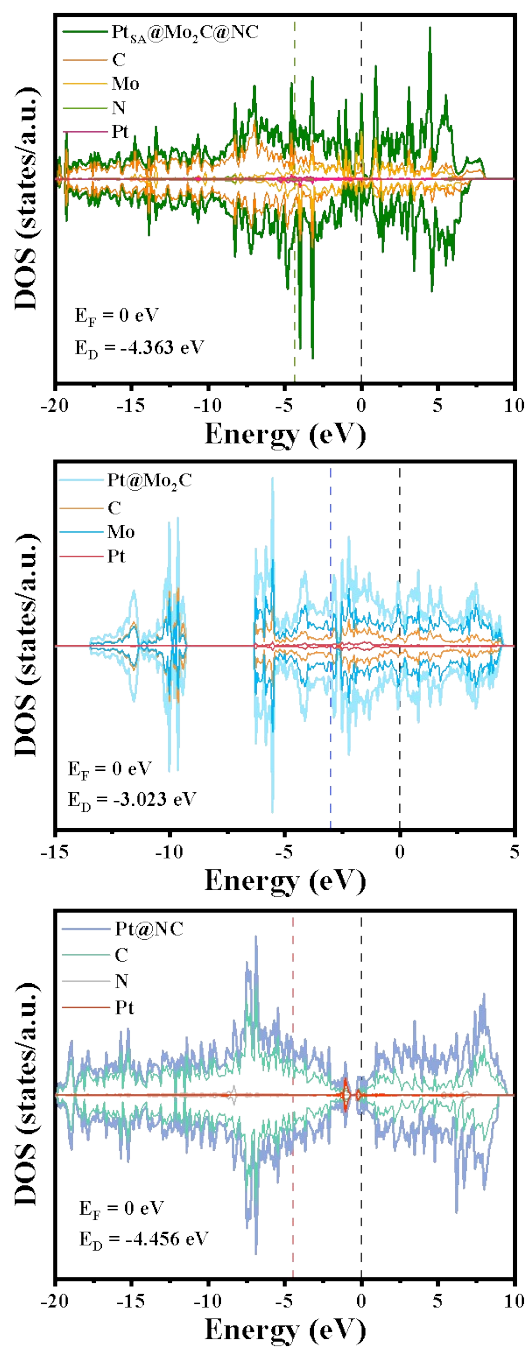

**Fig. S33.** Schematic of DOS with different elements of  $Pt_{SA}@Mo_2C@NC$ ,  $Pt@Mo_2C$  and  $Pt@NC$ .

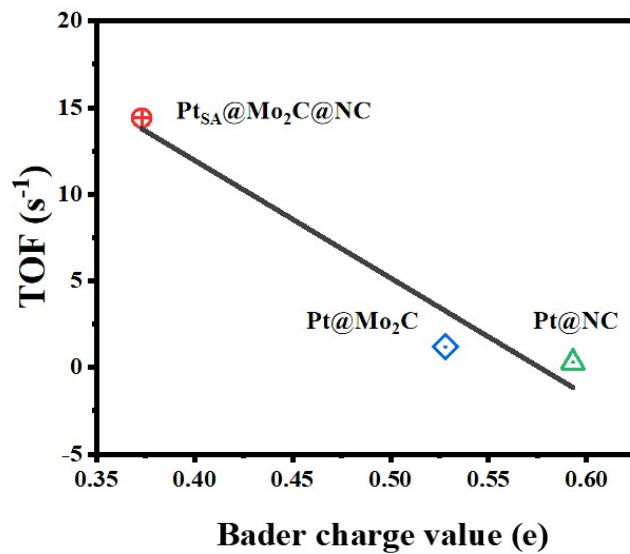

**Fig. S34.** Linear relationship between Bader charge value and TOF of Pt<sub>SA</sub>@Mo<sub>2</sub>C@NC, Pt@Mo<sub>2</sub>C and Pt@NC.

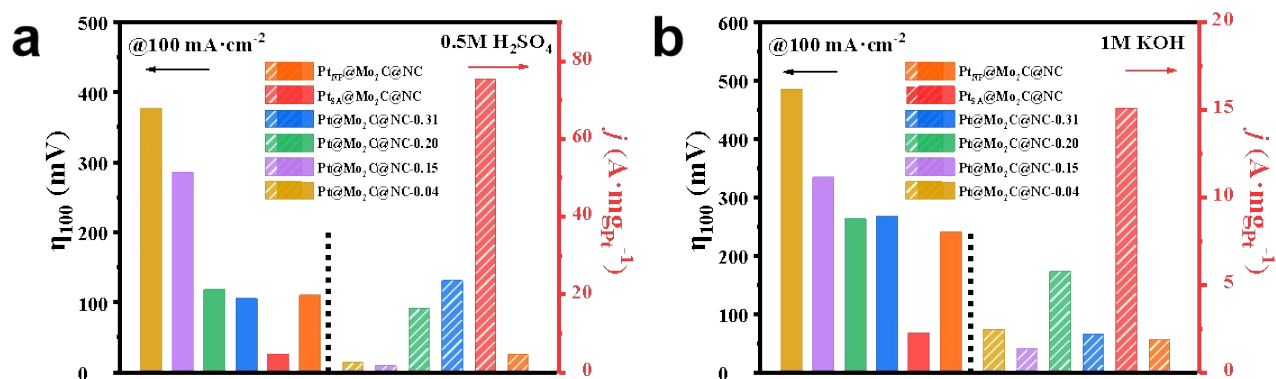

**Fig. S35.** Pt loading optimization results are plotted for samples with different Pt wt%: Pt<sub>NP</sub>@Mo<sub>2</sub>C@NC (1.05%), Pt<sub>SA</sub>@Mo<sub>2</sub>C@NC (0.94%), Pt@Mo<sub>2</sub>C@NC-0.31 (0.31%), Pt@Mo<sub>2</sub>C@NC-0.20 (0.20%), Pt@Mo<sub>2</sub>C@NC-0.15 (0.15%), Pt@Mo<sub>2</sub>C@NC-0.04 (0.04%). Comparative plots of overpoints and mass activity under acidic (A) and alkaline conditions (B).

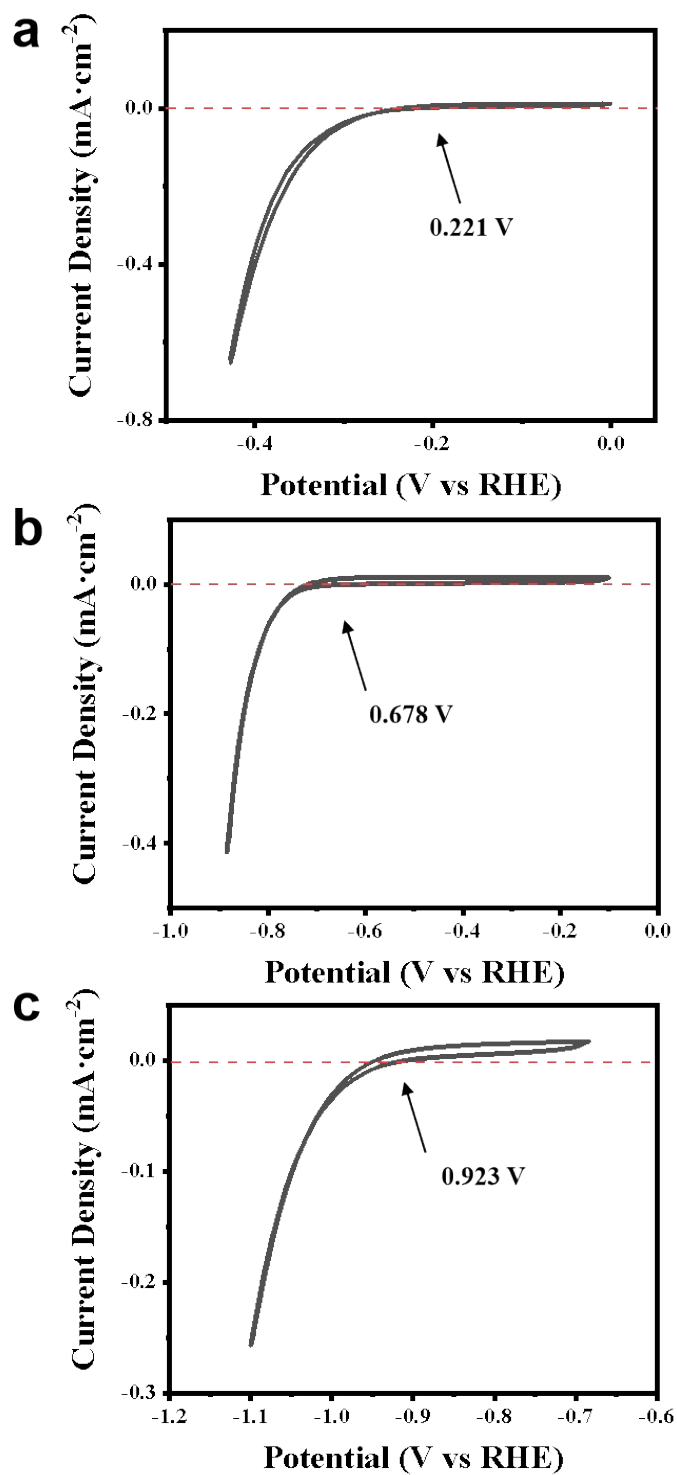

**Fig. S36.** The calibration curves of the Ag/AgCl electrode (a) and Hg/HgSO<sub>4</sub> electrode (b) in 0.5 M H<sub>2</sub>SO<sub>4</sub> solution and Hg/HgO electrode (c) in 1.0 M KOH solution.

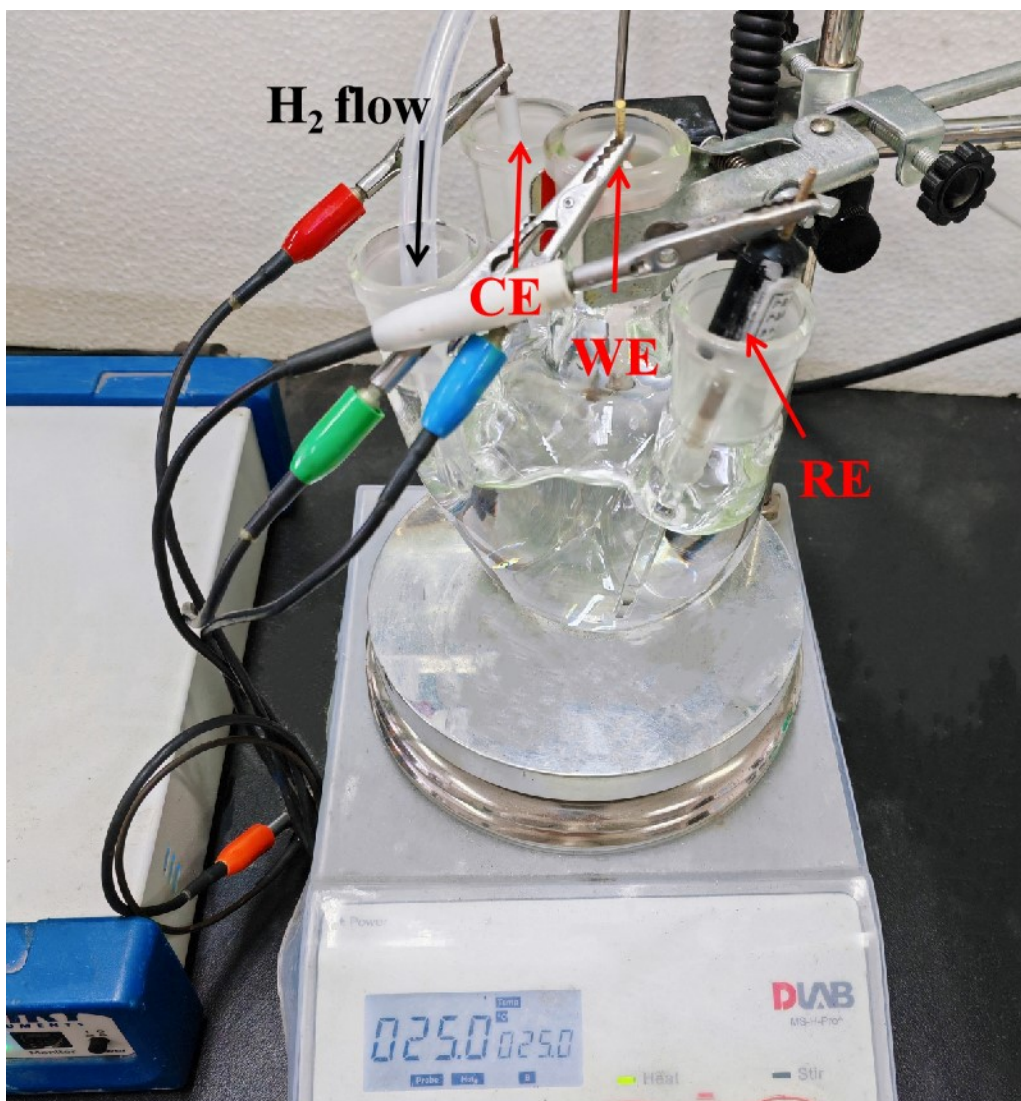

Fig. S37. The calibration setup of the reference electrode.

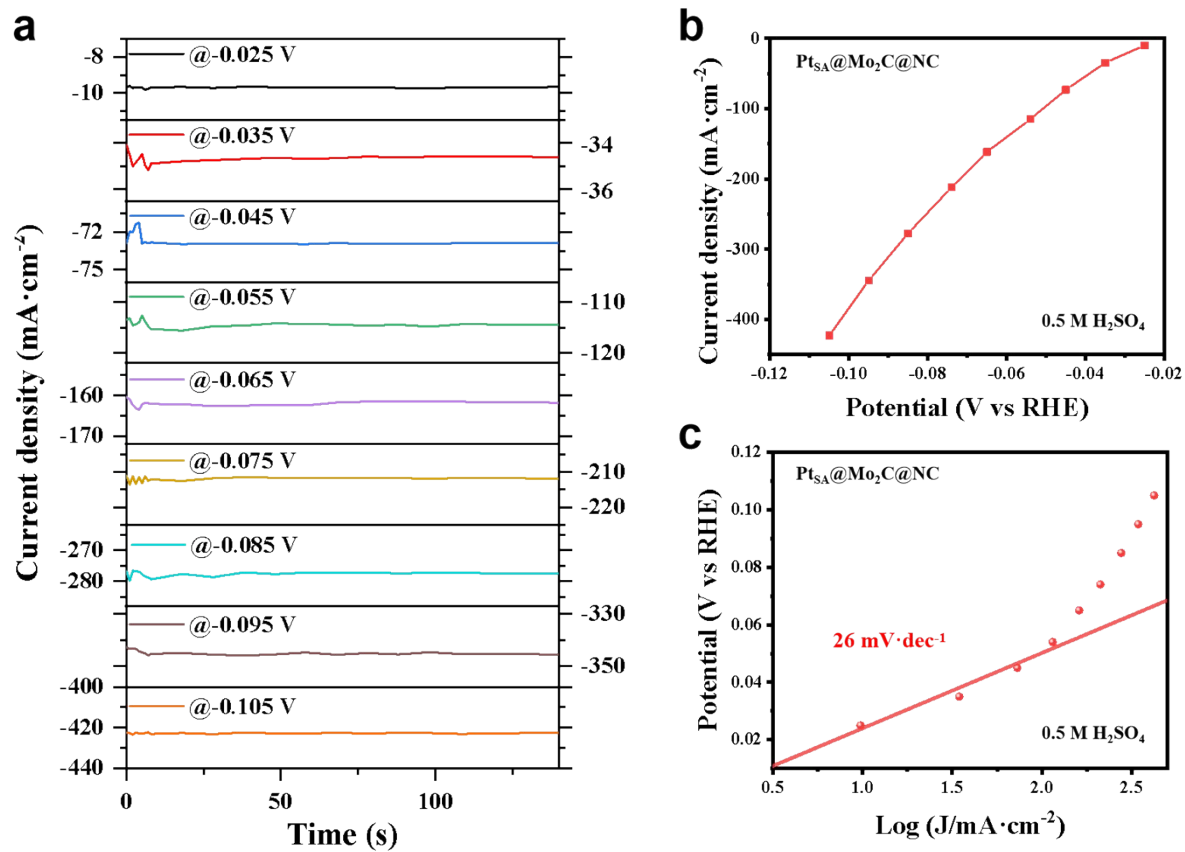

**Fig. S38.** (a) Chronoamperometry responses of activity stabilized Pt<sub>SA</sub>@Mo<sub>2</sub>C@NC catalyst in 0.5 M H<sub>2</sub>SO<sub>4</sub>, (b) plot of sampled HER current densities and (c) Tafel plot constructed from steady-state Chronoamperometry responses.

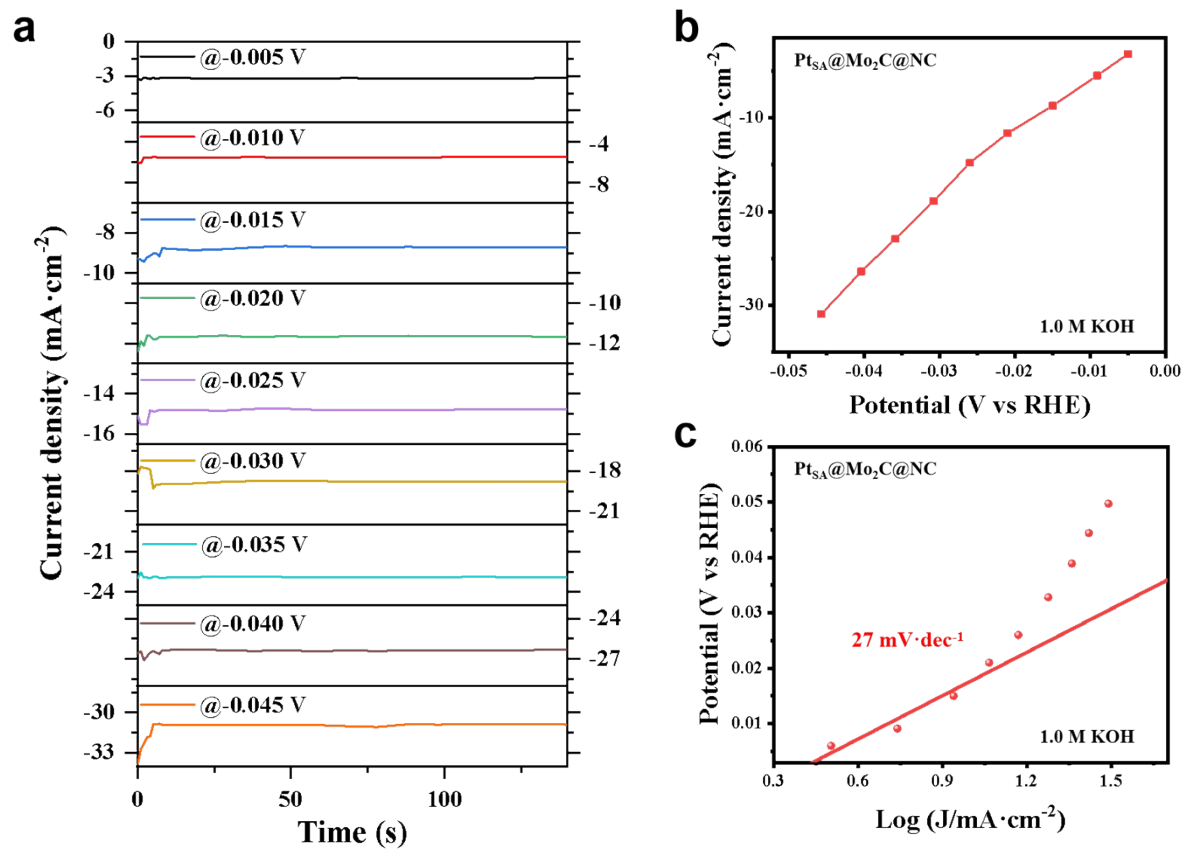

**Fig. S39.** (a) Chronoamperometry responses of activity stabilized Pt<sub>SA</sub>@Mo<sub>2</sub>C@NC catalyst in 1.0 M KOH, (b) plot of sampled HER current densities and (c) Tafel plot constructed from steady-state Chronoamperometry responses.



**Table S1.** Zn content of Mo<sub>2</sub>C@NC before and after 3M HCl treatment.

| <b>Sample</b>        | <b>Operation</b> | <b>Zn content (wt%)</b> |
|----------------------|------------------|-------------------------|
| Mo <sub>2</sub> C@NC | Before 3M HCl    | 0.05                    |
|                      | After 3M HCl     | /                       |

**Table S2.** Structural parameters extracted from the Pt L<sub>3</sub>-edge EXAFS fitting.

| Sample                                 | Scattering pair | CN       | R(Å)     | $\sigma^2(10^{-3}\text{Å}^2)$ | $\Delta E_0(\text{eV})$ | R    |
|----------------------------------------|-----------------|----------|----------|-------------------------------|-------------------------|------|
|                                        | Pt-C            | 1.61 (7) | 2.03 (5) | 0.008 (7)                     |                         |      |
| Pt <sub>SA</sub> @Mo <sub>2</sub> C@NC | Pt-N            | 1.43 (8) | 2.56 (5) | 0.001 (5)                     | 5.5 (4)                 | 0.02 |
|                                        | Pt-Mo           | 1.96     | 2.75 (3) | 0.003 (4)                     |                         |      |

**Table S3.** Comparison of HER performance of Pt<sub>SA</sub>@Mo<sub>2</sub>C@NC with reported electrocatalysts in 0.5 M H<sub>2</sub>SO<sub>4</sub>.

| Electrocatalyst                                                 | Tafel slope<br>(mV·dec <sup>-1</sup> ) | Overpotential at<br>100mA·cm <sup>-2</sup><br>(mV) | References                                          |
|-----------------------------------------------------------------|----------------------------------------|----------------------------------------------------|-----------------------------------------------------|
| <b>This work</b>                                                | <b>14</b>                              | <b>2</b>                                           |                                                     |
| Pt SASs/AG                                                      | 29                                     | 12                                                 | <i>Energy Environ. Sci.</i> 2019 <sup>1</sup>       |
| Co-substituted Ru                                               | 29                                     | 13                                                 | <i>Nat. Commun.</i> 2018 <sup>2</sup>               |
| Pt-Cu/Mo <sub>2</sub> C                                         | 28.2                                   | 13                                                 | <i>Nanoscale</i> , 2020 <sup>3</sup>                |
| Pt-ACs/CoNC                                                     | 27.7                                   | 24                                                 | <i>Nat. Commun.</i> 2022 <sup>4</sup>               |
| Mo <sub>2</sub> C/CFP-Act                                       | 41                                     | 37                                                 | <i>J. Catal.</i> 2020 <sup>5</sup>                  |
| Pt/TiCO-F                                                       | 29.7                                   | 34                                                 | <i>Adv. Funct. Mater.</i> 2022 <sup>6</sup>         |
| Ti <sub>3</sub> C <sub>2</sub> T <sub>x</sub> -Pt <sub>SA</sub> | 45                                     | 38                                                 | <i>Nano Lett.</i> 2022 <sup>7</sup>                 |
| MAC@Pt 1000                                                     | 24.95                                  | 40                                                 | <i>Small.</i> 2022 <sup>8</sup>                     |
| PtCu/WO <sub>3</sub> @CF                                        | 45.9                                   | 41                                                 | <i>Adv. Funct. Mater.</i> 2022 <sup>9</sup>         |
| Pt/TiB <sub>x</sub> O <sub>y</sub>                              | 32                                     | 50                                                 | <i>ACS Catal.</i> 2022 <sup>10</sup>                |
| PtRu@C <sub>2</sub> N                                           | 31                                     | 52                                                 | <i>Chem. Eng. J.</i> 2022 <sup>11</sup>             |
| Ni-Mo <sub>2</sub> C@NPC                                        | 59                                     | 144                                                | <i>Appli. Catal. B: Environ.</i> 2021 <sup>12</sup> |
| FD-MoS <sub>2</sub> -5                                          | 36                                     | 164                                                | <i>Nat Commun.</i> 2022 <sup>13</sup>               |

**Table S4.** Comparison of HER performance of Pt<sub>SA</sub>@Mo<sub>2</sub>C@NC with reported electrocatalysts in 1.0 M KOH.

| Electrocatalyst                      | Tafel slope<br>(mV·dec <sup>-1</sup> ) | Overpotential at<br>10mA·cm <sup>-2</sup><br>(mV) | References                                             |
|--------------------------------------|----------------------------------------|---------------------------------------------------|--------------------------------------------------------|
| <b>This work</b>                     | <b>27</b>                              | <b>2</b>                                          |                                                        |
| PtRu/mCNTs                           | 33.5                                   | 15                                                | <i>Energy Environ. Sci.</i> 2022 <sup>14</sup>         |
| Pt@CoS                               | 31                                     | 28                                                | <i>Appli. Catal. B: Environ.</i><br>2022 <sup>15</sup> |
| Pt/A-NiCo LDH                        | 38.8                                   | 16                                                | <i>Chem. Commun.</i><br>2022 <sup>16</sup>             |
| PtW NWs/C                            | 29                                     | 43                                                | <i>Adv. Energy Mater.</i> 2022 <sup>17</sup>           |
| Pt/X-NCNT                            | 33.3                                   | 17                                                | <i>Adv. Energy Mater.</i> 2022 <sup>18</sup>           |
| NF-Na-Fe-Pt                          | 35.98                                  | 31                                                | <i>Appli. Catal. B: Environ.</i><br>2021 <sup>19</sup> |
| Ni-Mo <sub>2</sub> C@NPC             | 64                                     | 183                                               | <i>Appli. Catal. B: Environ.</i><br>2021 <sup>12</sup> |
| Pt <sub>1</sub> -Mo <sub>2</sub> C-C | 64                                     | 155                                               | <i>J. Energy Chem.</i> 2021 <sup>20</sup>              |
| PtRu@C <sub>2</sub> N                | 63                                     | 59                                                | <i>Chem. Eng. J.</i> 2022 <sup>11</sup>                |
| Pt <sub>SA</sub> -NiO/Ni             | 27.07                                  | 26                                                | <i>Nat. Commun.</i> 2021 <sup>21</sup>                 |
| Ru@NC                                | 36                                     | 26                                                | <i>Angew. Chem. Int. Ed.</i><br>2018 <sup>22</sup>     |

**Table S5.** Pt composition of the as prepared catalysts derived from ICP elemental analysis.

| <b>Element</b> | <b>Pt<sub>SA</sub>@Mo<sub>2</sub>C@NC</b> | <b>Pt<sub>NP</sub>@Mo<sub>2</sub>C@<br/>NC</b> | <b>20% Pt/C</b> |
|----------------|-------------------------------------------|------------------------------------------------|-----------------|
| Pt             | 0.93% wt                                  | 1.05% wt                                       | 20% wt          |

**Table S6.** Mass activity of Pt<sub>SA</sub>@Mo<sub>2</sub>C@NC and reference catalysts.

| <b>Electrocatalyst</b>                                          | <b>Mass activity<br/>(A·mg<sub>Pt</sub><sup>-1</sup>)</b> | <b>Overpotential<br/>(V)</b> | <b>References</b>                             |
|-----------------------------------------------------------------|-----------------------------------------------------------|------------------------------|-----------------------------------------------|
| <b>This work</b>                                                | <b>75.21</b>                                              | <b>0.1</b>                   |                                               |
| Ti <sub>3</sub> C <sub>2</sub> T <sub>x</sub> -Pt <sub>SA</sub> | 23.21                                                     | 0.1                          | <i>Nano Lett.</i> 2022 <sup>7</sup>           |
| PtCu/WO <sub>3</sub> @CF                                        | 10.86                                                     | 0.1                          | <i>Adv. Funct. Mater.</i> 2022 <sup>9</sup>   |
| MAC@Pt 1000                                                     | 1.500                                                     | 0.1                          | <i>Small</i> 2022 <sup>8</sup>                |
| Pt SASS/AG                                                      | 22.40                                                     | 0.05                         | <i>Energy Environ. Sci.</i> 2019 <sup>1</sup> |
| Pt-ACs/CoNC                                                     | 28.6                                                      | 0.05                         | <i>Nat. Commun.</i> 2022 <sup>4</sup>         |
| Pt/MXene                                                        | 1.847                                                     | 0.05                         | <i>Adv. Funct. Mater.</i> 2022 <sup>23</sup>  |

**Table S7.** ICP-OES results of Pt elements before and after 12,000 cycle scans of Pt<sub>SA</sub>@Mo<sub>2</sub>C@NC in 0.5 M H<sub>2</sub>SO<sub>4</sub> and 1.0 M KOH solutions.

| Pt <sub>SA</sub> @Mo <sub>2</sub> C@NC | 0.5 M H <sub>2</sub> SO <sub>4</sub> | 1.0 M KOH |
|----------------------------------------|--------------------------------------|-----------|
| Before HER                             | 0.94% wt                             | 0.94% wt  |
| After HER                              | 0.92% wt                             | 0.93% wt  |

**Table S8.** Bader charge and value calculation results of Pt<sub>SA</sub>@Mo<sub>2</sub>C@NC, Pt@Mo<sub>2</sub>C and Pt@NC.

| Catalyst                               | Bader charge (e <sup>-</sup> ) | Value (e <sup>-</sup> ) |
|----------------------------------------|--------------------------------|-------------------------|
| Pt <sub>SA</sub> @Mo <sub>2</sub> C@NC | 9.813                          | 0.373                   |
| Pt@Mo <sub>2</sub> C                   | 9.703                          | 0.593                   |
| Pt@NC                                  | 9.736                          | 0.528                   |



## Reference

1. S. Ye, F. Luo, Q. Zhang, P. Zhang, T. Xu, Q. Wang, D. He, L. Guo, Y. Zhang, C. He, X. Ouyang, M. Gu, J. Liu and X. Sun, *Energy & Environmental Science*, 2019, **12**, 1000-1007.
2. J. Mao, C. T. He, J. Pei, W. Chen, D. He, Y. He, Z. Zhuang, C. Chen, Q. Peng, D. Wang and Y. Li, *Nat Commun*, 2018, **9**, 4958.
3. W. Jia, J. Zhang, Z. Lu, S. Wang and S. Feng, *Nanoscale*, 2020, **12**, 3902-3906.
4. Y. Zhao, P. V. Kumar, X. Tan, X. Lu, X. Zhu, J. Jiang, J. Pan, S. Xi, H. Y. Yang, Z. Ma, T. Wan, D. Chu, W. Jiang, S. C. Smith, R. Amal, Z. Han and X. Lu, *Nat Commun*, 2022, **13**, 2430.
5. J. He, Z. Cui, S. Zhu, Z. Li, S. Wu, L. Zheng, Z. Gao and Y. Liang, *Journal of Catalysis*, 2020, **384**, 169-176.
6. Y. Wu, W. Wei, R. Yu, L. Xia, X. Hong, J. Zhu, J. Li, L. Lv, W. Chen, Y. Zhao, L. Zhou and L. Mai, *Advanced Functional Materials*, 2022, **32**.
7. J. Zhang, E. Wang, S. Cui, S. Yang, X. Zou and Y. Gong, *Nano Lett*, 2022, **22**, 1398-1405.
8. M. Sheng, X. Bin, Y. Yang, Y. Tang and W. Que, *Small*, 2022, **18**, e2203471.
9. L. Liu, Y. Wang, Y. Zhao, Y. Wang, Z. Zhang, T. Wu, W. Qin, S. Liu, B. Jia, H. Wu, D. Zhang, X. Qu, M. Chhowalla and M. Qin, *Advanced Functional Materials*, 2022, **32**.
10. X. Cheng, B. Xiao, Y. Chen, Y. Wang, L. Zheng, Y. Lu, H. Li and G. Chen, *ACS Catalysis*, 2022, **12**, 5970-5978.
11. C. Li, L. Zhang, Y. Zhang, Y. Zhou, J. Sun, X. Ouyang, X. Wang, J. Zhu and Y. Fu, *Chemical Engineering Journal*, 2022, **428**, 131085.
12. Y. Lu, C. Yue, Y. Li, W. Bao, X. Guo, W. Yang, Z. Liu, P. Jiang, W. Yan, S. Liu, Y. Pan and Y. Liu, *Applied Catalysis B: Environmental*, 2021, **296**.
13. J. Xu, G. Shao, X. Tang, F. Lv, H. Xiang, C. Jing, S. Liu, S. Dai, Y. Li, J. Luo and Z. Zhou, *Nature Communications*, 2022, **13**, 2193.
14. B. Pang, X. Liu, T. Liu, T. Chen, X. Shen, W. Zhang, S. Wang, T. Liu, D. Liu, T. Ding, Z. Liao, Y. Li, C. Liang and T. Yao, *Energy & Environmental Science*, 2022, **15**, 102-108.
15. A. Mosallanezhad, C. Wei, P. Ahmadian Koudakan, Y. Fang, S. Niu, Z. Bian, B. Liu, T. Huang, H. Pan and G. Wang, *Applied Catalysis B: Environmental*, 2022, **315**, 121534.
16. B. Fan†, H. Wang†, X. Han, Y. Deng and W. Hu, *Chemical Communications*, 2022, **58**, 8254-8257.
17. L. Gao, Z. Yang, T. Sun, X. Tan, W. Lai, M. Li, J. Kim, Y.-F. Lu, S.-I. Choi, W. Zhang, C. Ma, S. C. Smith, Y.-G. Zhou and H. Huang, *Advanced Energy Materials*, 2022, **12**, 2103943.
18. W. Yu, H. Huang, Y. Qin, D. Zhang, Y. Zhang, K. Liu, Y. Zhang, J. Lai and L. Wang, *Advanced Energy Materials*, 2022, **12**, 2200110.
19. Y. Zhao, Y. Gao, Z. Chen, Z. Li, T. Ma, Z. Wu and L. Wang, *Applied Catalysis B: Environmental*, 2021, **297**, 120395.
20. S. Niu, J. Yang, H. Qi, Y. Su, Z. Wang, J. Qiu, A. Wang and T. Zhang, *Journal of Energy Chemistry*, 2021, **57**, 371-377.
21. K. L. Zhou, Z. Wang, C. B. Han, X. Ke, C. Wang, Y. Jin, Q. Zhang, J. Liu, H. Wang and H. Yan, *Nature Communications*, 2021, **12**, 3783.
22. Z.-L. Wang, K. Sun, J. Henzie, X. Hao, C. Li, T. Takeji, Y.-M. Kang and Y. Yamauchi, *Angewandte Chemie International Edition*, 2018, **57**, 5848-5852.
23. Y. Wu, W. Wei, R. Yu, L. Xia, X. Hong, J. Zhu, J. Li, L. Lv, W. Chen, Y. Zhao, L. Zhou and L. Mai, *Advanced Functional Materials*, 2022, **32**, 2110910.
